# Supplementary material
Source: MDPI journal article supplement (https://www.mdpi.com/2071-1050/13/2/831)
Supplement: s1 [file s1]

Gender	Age_Group	Education	Employement	Months_using_mobile_banking	PU1	PU2	PU3	PU4	PU5	PE1	PE2	PE3	PE4	PE5	PE6	SI1	SI2	SI3	SI4	SI5	FC1	FC2	FC3	FC4	FC5	CM1	CM2	CM3	CM4	TR1	TR2	TR3	TR4	TR5	TR6	IWP1	IWP2	IWP3	IWP4	IWP5	IWP6	AWP1	AWP2	AWP3	AWP4	AWP5
1	1	2	0	2	5	4	4	5	5	5	4	5	5	5	4	4	4	4	5	4	3	4	4	4	4	4	4	4	4	5	4	4	4	4	4	4	4	4	5	5	4	5	5	5	5	5
1	3	5	1	4	5	4	4	5	4	2	5	3	3	3	3	3	4	4	4	4	4	4	3	4	4	4	4	4	4	4	4	4	4	4	4	4	4	4	4	4	4	4	4	5	4	4
1	2	3	1	3	5	5	3	5	3	5	4	5	5	5	4	3	1	1	4	2	3	3	4	4	4	1	4	3	4	5	3	3	3	3	4	4	3	5	3	3	3	3	3	3	5	1
1	2	1	1	4	3	2	3	3	3	4	3	3	3	4	4	3	3	3	4	3	3	3	3	3	3	4	3	3	3	3	3	3	3	3	3	4	3	4	3	5	5	3	4	4	4	4
1	2	1	1	3	4	4	4	4	4	4	4	4	4	4	4	4	4	4	4	4	5	5	5	5	4	4	5	4	4	4	4	4	4	4	4	5	5	5	5	5	4	4	5	4	4	4
1	2	1	1	4	5	5	5	5	5	5	5	5	4	5	5	5	5	5	5	5	5	5	5	5	5	5	5	5	5	5	5	5	5	5	5	4	4	5	5	5	5	5	5	5	5	4
1	2	1	1	4	5	5	5	5	5	5	5	5	4	5	5	5	5	5	5	5	5	5	5	5	5	5	5	5	5	5	5	5	5	5	5	4	4	5	5	5	5	5	5	5	5	4
1	4	4	1	4	2	2	3	4	3	3	4	4	3	3	3	3	3	3	3	3	2	2	2	2	3	3	2	2	2	2	2	3	3	3	3	3	2	2	3	3	3	3	3	3	3	3
1	4	4	1	4	5	5	3	5	4	5	4	5	3	5	3	4	3	3	4	4	4	3	5	3	4	3	4	4	4	4	3	3	4	3	4	4	4	4	3	3	4	3	3	5	5	3
0	3	4	1	4	5	4	4	5	5	5	4	5	2	5	4	4	4	4	5	4	3	4	4	4	4	4	4	4	4	5	4	4	4	4	4	4	4	4	5	5	4	5	5	5	5	5
1	2	4	1	4	5	4	3	5	3	4	4	4	5	4	3	4	4	4	4	3	2	3	5	4	3	4	4	4	4	5	4	4	3	5	4	4	4	5	3	4	4	4	4	5	4	3
0	3	4	1	4	5	5	5	5	4	4	5	5	1	4	4	4	5	5	5	5	3	5	4	5	4	5	5	5	5	5	4	4	4	5	5	4	5	5	5	5	5	4	5	5	5	2
1	2	4	1	1	3	2	3	2	2	3	3	3	4	3	2	2	2	2	2	2	2	2	2	2	2	2	2	3	2	2	2	2	2	2	2	2	3	2	2	2	3	2	2	2	2	2
0	4	4	1	4	5	5	5	5	4	4	4	4	3	4	3	5	5	5	5	5	5	5	5	5	4	5	4	4	4	5	4	4	3	5	5	4	4	5	4	5	5	4	4	5	5	4
1	2	4	1	4	5	5	5	5	5	5	5	5	5	5	5	5	5	4	5	4	5	5	5	5	5	5	5	5	5	5	4	4	4	4	5	5	5	5	5	5	5	5	5	5	5	5
1	2	4	1	4	5	5	4	5	4	5	4	4	4	3	4	5	4	3	5	5	3	5	4	4	4	4	4	4	4	4	3	4	3	4	4	4	4	4	4	3	4	3	1	5	5	3
1	2	1	1	1	5	5	5	5	5	5	5	5	3	5	5	5	5	5	5	5	5	5	5	5	5	5	5	5	5	5	5	5	5	5	5	5	5	5	5	5	5	5	5	5	5	5
1	4	4	1	3	5	5	5	5	3	4	5	5	5	5	5	5	3	4	4	3	4	3	4	4	4	4	3	4	4	4	4	4	2	3	4	4	3	5	4	4	4	3	2	2	3	3
0	3	1	1	1	3	3	3	4	2	3	3	3	2	3	4	3	2	3	2	2	2	2	3	3	2	2	2	3	2	2	4	3	3	2	3	4	3	4	2	2	3	3	2	1	3	1
1	2	1	0	4	5	5	5	4	4	4	4	5	3	4	4	4	4	3	5	4	3	4	4	5	4	5	4	5	5	5	4	4	3	4	5	5	4	4	5	5	5	4	4	5	5	4
1	3	3	1	3	4	4	4	4	4	4	3	4	3	4	4	3	3	3	4	3	3	3	3	3	4	4	3	3	4	4	3	4	3	4	4	5	4	3	3	3	4	3	3	3	3	3
0	2	3	1	4	3	3	3	4	4	4	3	3	5	3	3	3	4	3	4	4	3	4	3	3	4	4	4	4	4	4	4	4	4	4	4	4	4	4	4	4	4	4	4	4	4	4
1	4	4	1	4	3	3	4	5	3	4	3	3	3	3	4	3	3	4	3	3	3	3	3	3	3	3	3	3	4	4	4	4	3	3	4	3	5	5	4	4	3	3	3	3	3	3
0	1	3	1	3	5	5	5	5	5	5	5	5	2	5	5	5	5	5	5	5	5	5	5	5	5	5	5	5	5	5	5	5	5	5	5	5	5	5	5	5	5	5	5	5	5	5
1	2	3	1	4	5	5	5	5	5	5	5	5	3	5	5	5	5	5	5	5	4	4	5	5	5	5	5	5	5	5	5	5	5	5	5	5	5	5	5	5	4	4	4	5	5	4
0	2	4	1	4	4	4	4	5	2	5	5	5	4	5	5	5	2	2	4	5	4	3	5	4	4	4	4	4	4	4	4	4	4	4	4	4	4	4	5	4	4	3	3	3	4	2
0	2	3	1	4	3	3	4	5	4	5	4	5	3	5	4	5	4	3	3	3	3	3	3	3	4	3	3	3	5	5	5	5	5	4	4	5	3	5	4	4	4	4	3	3	3	3
1	2	3	0	2	4	4	3	5	5	4	4	4	4	4	4	3	3	3	5	3	2	3	5	5	3	3	4	2	3	4	3	4	2	4	4	4	2	3	2	3	4	1	3	3	3	3
1	2	1	1	2	4	3	3	4	4	4	2	4	2	4	4	4	3	3	4	3	3	3	3	3	3	4	3	3	4	5	3	4	4	4	4	4	4	3	4	4	4	3	4	3	4	4
0	2	3	1	4	5	4	5	5	5	5	5	5	2	5	5	4	5	5	5	5	4	4	4	5	4	4	4	5	5	5	4	4	4	5	4	4	5	5	5	5	4	4	3	5	5	5
1	2	1	0	1	4	3	4	5	3	5	3	3	2	5	5	4	3	3	3	4	3	3	2	5	3	4	2	2	3	4	3	3	3	2	2	3	2	3	3	4	4	3	4	5	4	4
1	2	3	1	4	5	4	3	4	4	5	4	5	5	5	5	5	4	4	5	5	4	5	5	5	4	4	4	4	4	4	4	4	4	4	4	4	4	4	4	4	5	4	4	4	4	3
1	2	1	0	4	5	4	4	5	5	5	3	4	4	4	3	4	4	4	5	5	4	4	4	4	5	5	5	5	5	5	4	4	4	4	4	4	3	4	5	5	5	4	4	4	4	3
1	2	3	0	2	4	4	3	4	3	2	3	3	5	2	3	4	4	4	5	4	3	4	4	4	4	4	3	3	3	3	5	3	5	3	4	5	3	4	3	4	4	3	3	4	3	2
0	2	3	0	4	4	4	4	5	3	4	4	4	3	4	4	4	3	4	5	2	3	4	4	4	4	4	4	4	4	4	5	5	5	5	4	4	4	4	4	4	5	3	3	5	5	3
0	1	3	0	2	3	4	4	4	4	5	4	4	4	4	4	3	4	4	4	4	4	4	4	3	3	4	4	4	4	3	4	4	4	4	4	3	3	3	4	3	3	3	3	3	3	3
1	4	5	1	4	5	5	4	5	5	5	5	5	3	5	5	5	4	4	1	4	4	4	5	5	5	5	4	5	5	5	4	5	5	5	5	5	5	5	5	5	5	4	5	1	5	5
0	1	3	0	4	4	1	5	2	5	2	1	4	4	3	4	4	4	5	4	3	4	5	5	5	5	5	5	5	5	5	4	4	4	5	3	4	3	4	4	3	4	4	5	4	4	4
1	2	3	1	2	3	2	1	4	3	5	3	4	1	4	4	3	2	1	5	4	4	4	4	5	3	4	3	4	3	5	1	2	1	3	3	3	1	4	4	3	4	2	1	1	3	5
1	2	1	0	2	5	5	5	5	4	5	4	5	4	4	5	4	4	5	5	5	4	5	5	3	5	3	5	4	5	5	5	5	5	5	5	5	3	5	3	4	4	3	4	5	3	3
0	2	3	1	4	4	4	5	5	5	4	5	5	5	4	4	4	5	4	5	5	2	2	4	4	4	4	4	4	5	5	5	4	5	5	4	5	4	4	3	4	3	3	4	4	4	5
0	2	1	0	1	4	4	4	5	5	4	5	5	4	4	4	4	4	5	4	4	4	4	4	4	4	4	4	4	4	4	4	4	4	4	4	4	4	4	4	4	4	3	4	4	4	5
1	2	3	1	4	5	5	5	5	5	5	5	5	2	5	5	5	5	5	5	5	5	5	5	5	5	5	5	5	5	5	5	5	5	5	5	5	5	5	5	5	5	5	5	5	5	5
1	4	4	1	4	5	5	4	5	3	3	3	3	3	4	3	4	4	3	4	4	4	4	5	5	3	5	4	4	4	4	2	3	3	4	4	3	4	4	4	4	4	4	4	4	4	4
0	3	4	1	4	4	3	3	4	3	4	4	4	4	3	3	3	2	3	3	3	3	3	4	4	3	4	4	3	4	4	3	3	2	3	3	3	3	5	3	3	3	3	3	3	3	3
0	2	3	0	3	4	5	4	5	5	5	5	5	4	5	5	5	5	5	5	5	4	4	4	4	4	4	5	4	5	5	5	5	5	5	5	5	5	5	5	5	5	3	4	5	5	4
0	2	3	1	4	5	4	4	5	5	4	4	5	5	5	4	3	5	3	4	5	5	5	3	3	3	4	4	5	3	4	3	4	2	4	5	4	4	5	5	5	4	5	5	5	5	5
0	2	1	1	2	4	4	4	4	4	4	4	4	5	4	4	4	4	4	4	4	4	4	4	4	4	4	4	4	4	4	4	4	4	4	4	4	4	4	4	4	4	4	4	4	4	4
1	2	3	0	2	4	4	4	5	4	5	4	5	4	4	4	4	3	3	4	4	2	2	3	4	4	4	4	4	4	4	4	5	4	4	4	4	4	4	4	4	5	3	5	3	3	3
0	2	2	1	4	5	2	5	5	2	5	5	5	3	5	5	5	2	2	4	4	4	2	5	5	5	5	5	5	5	5	5	5	5	5	5	5	5	5	4	4	4	4	4	5	5	1
1	2	3	0	1	3	4	4	4	5	4	4	5	4	4	4	4	3	4	4	3	3	3	3	2	3	3	3	3	4	4	4	4	4	4	4	4	4	4	4	3	3	3	4	4	3	3
1	2	1	0	3	5	5	5	5	5	5	5	5	4	5	5	5	5	5	5	5	5	5	5	5	4	5	5	5	5	5	4	4	4	5	5	5	3	4	5	5	5	3	5	5	5	5
0	2	1	1	1	4	4	4	4	4	4	4	4	5	4	4	4	4	4	4	4	4	4	4	4	4	4	4	4	4	5	4	4	4	4	4	4	4	4	4	4	4	4	4	4	4	4
0	2	4	1	4	5	1	2	5	3	5	4	5	4	5	5	3	3	3	4	3	2	1	4	5	4	5	4	3	4	5	5	5	5	5	5	5	4	4	4	3	3	3	4	5	5	1
0	2	3	0	4	4	4	3	5	3	5	4	5	2	5	5	4	3	3	4	2	3	3	3	4	3	3	4	3	4	4	3	3	3	3	3	4	4	4	4	4	4	3	3	5	5	4
0	2	1	0	4	5	5	5	5	5	5	5	5	5	5	5	5	3	3	5	5	5	5	2	5	5	4	3	3	4	3	4	4	4	3	4	4	4	4	3	5	4	3	3	3	4	5
1	2	3	1	3	4	4	5	5	5	5	5	5	5	5	5	5	5	5	5	4	4	4	4	4	5	4	5	4	5	4	4	4	4	4	4	4	4	4	5	4	4	4	4	4	5	4
0	2	1	0	1	4	4	3	5	5	4	4	4	5	4	4	5	3	3	4	3	3	3	4	4	5	5	4	3	3	4	4	4	5	5	5	5	5	5	4	4	4	3	3	3	3	4
1	4	5	1	4	5	5	5	5	4	4	5	5	3	5	4	4	3	3	5	5	5	4	5	4	4	5	4	4	4	5	4	4	4	5	4	3	4	5	4	4	4	3	4	4	4	3
1	2	3	0	4	4	4	3	4	4	4	3	3	4	3	4	3	3	3	4	5	5	2	3	3	4	4	5	4	5	4	4	4	4	4	4	4	4	4	5	4	4	3	3	5	3	4
1	2	3	1	2	4	4	4	4	4	4	4	4	4	4	4	4	4	4	4	4	4	4	4	4	4	4	4	4	4	4	4	4	4	4	4	4	4	4	4	4	4	4	4	4	4	4
1	2	1	0	1	4	4	2	4	2	4	4	4	4	4	4	3	3	3	5	2	3	4	4	2	4	4	5	4	5	4	3	4	4	5	5	5	5	5	5	4	4	2	2	2	2	4
0	1	1	0	2	4	3	3	4	4	4	4	4	4	3	4	3	3	3	3	3	3	3	3	3	3	3	3	3	3	3	3	4	5	5	5	5	3	4	4	4	3	4	4	4	4	4
1	4	4	1	4	4	4	4	4	4	4	4	4	5	4	4	4	4	4	4	4	4	4	4	4	4	4	4	4	4	4	4	4	4	4	4	4	4	4	4	4	4	4	4	3	3	3
0	1	3	0	2	4	2	4	4	4	4	4	5	5	5	4	3	4	3	4	3	3	4	4	4	4	5	4	3	4	5	4	5	5	5	4	5	4	4	3	4	4	2	3	4	4	3
1	3	4	1	4	5	5	5	5	4	5	5	5	3	5	5	5	3	3	4	4	4	4	4	4	4	4	3	3	3	4	2	2	2	4	4	3	4	4	4	4	4	4	4	5	4	3
0	2	1	1	4	5	4	4	4	3	3	4	4	3	4	4	4	3	3	3	3	2	2	2	2	3	3	3	2	3	3	3	3	3	3	3	3	3	3	3	3	3	3	2	4	3	2
1	2	4	1	4	4	4	5	5	5	5	4	4	5	5	5	5	4	4	4	4	4	4	5	5	4	4	4	4	5	5	4	4	4	4	4	4	5	5	5	5	5	5	4	3	5	4
1	4	4	1	3	4	4	4	4	4	4	4	4	4	4	4	4	3	3	4	3	4	4	4	4	4	4	4	4	4	4	4	4	4	4	4	4	4	4	4	4	4	4	4	4	4	3
1	4	4	1	4	5	5	5	5	5	5	5	5	3	5	4	5	2	2	4	3	4	2	5	5	4	4	3	4	4	5	4	4	3	4	4	4	3	4	4	3	4	3	1	1	5	1
0	2	3	0	1	4	3	3	5	5	5	4	4	5	4	5	5	3	3	4	1	2	3	4	1	2	3	2	2	1	1	4	4	4	4	3	3	3	3	3	3	3	3	3	3	4	4
1	4	5	1	4	4	4	4	5	4	4	4	4	5	4	4	4	3	3	4	3	4	3	4	4	3	4	3	3	4	4	4	4	4	3	4	4	3	4	3	4	4	3	4	4	3	4
0	2	3	0	1	5	4	4	5	3	4	5	4	3	3	3	4	3	4	5	5	4	3	3	2	4	4	4	3	4	5	5	4	4	5	3	3	4	3	3	2	2	1	3	2	1	3
0	4	4	1	4	5	5	5	5	5	5	5	5	5	5	5	5	4	4	5	1	2	2	5	5	5	5	5	4	4	4	4	4	4	5	4	5	5	5	5	5	5	5	5	5	5	4
0	1	1	0	4	5	5	5	5	5	5	5	5	4	5	5	5	4	4	5	5	5	5	5	4	5	5	5	5	4	5	5	5	5	5	5	5	5	5	5	5	5	3	5	5	5	4
1	4	5	1	4	3	4	4	3	2	4	4	4	3	4	3	3	3	2	4	4	3	3	4	4	3	3	3	3	3	4	2	3	2	3	3	4	3	3	3	3	3	2	3	3	3	3
1	2	1	0	1	4	5	3	3	3	4	4	4	5	3	4	4	4	4	5	3	3	4	3	3	4	3	3	2	3	4	4	4	4	3	3	4	3	3	4	4	4	3	4	4	4	4
1	2	1	0	1	4	5	3	3	3	4	4	4	3	3	4	4	4	4	5	3	3	4	3	3	4	3	3	2	3	4	4	4	4	3	3	4	3	3	4	4	4	3	4	4	4	4
0	2	3	1	3	3	4	4	4	3	4	4	4	5	4	4	4	4	3	4	4	4	2	4	4	4	4	3	3	4	4	4	4	4	3	4	4	3	4	3	4	4	3	3	3	3	4
0	1	1	0	1	5	4	4	5	4	5	5	5	5	5	5	3	4	4	5	4	4	4	4	4	4	4	4	3	3	5	4	4	4	3	3	4	4	4	4	4	4	4	5	5	4	3
1	4	5	1	3	3	3	2	3	3	3	3	3	4	3	3	3	3	2	3	3	3	3	2	3	3	2	2	2	2	2	3	3	1	3	2	3	2	3	2	2	2	2	2	2	2	1
0	2	4	1	3	5	5	3	5	4	4	4	4	2	4	4	4	4	4	2	3	3	3	4	4	4	4	4	5	4	4	3	3	2	4	4	4	4	4	5	4	4	3	4	3	4	2
0	1	3	0	4	4	5	3	4	4	4	5	5	2	5	5	5	5	5	5	5	5	5	5	5	5	5	5	5	5	5	5	5	5	5	5	5	5	5	5	5	5	5	5	5	5	5
0	3	4	1	4	5	5	5	5	5	5	5	5	5	5	5	4	4	4	5	5	4	5	5	5	4	5	3	5	5	5	3	4	3	4	4	4	5	5	5	5	5	4	5	5	5	4
0	1	3	0	2	3	3	3	4	4	3	3	4	2	3	3	3	3	4	3	4	2	3	2	2	2	3	3	3	3	3	4	3	3	3	3	3	3	3	3	4	4	3	4	4	5	3
	4	4	1	4	5	5	5	5	5	5	5	5	3	5	5	5	5	5	5	5	5	5	5	3	5	5	5	5	5	5	5	3	3	5	3	5	4	5	5	5	5	3	5	5	5	3
1	2	3	0	2	4	4	3	4	3	3	3	4	5	4	4	3	3	4	2	2	2	3	3	3	3	4	3	3	3	4	3	3	3	4	4	3	2	3	2	2	3	2	3	3	4	3
0	2	4	1	4	5	5	4	5	4	5	3	5	3	5	5	5	4	5	4	3	3	4	5	5	4	5	5	5	5	5	3	4	3	3	4	3	4	4	5	4	5	4	3	5	5	3
0	1	3	0	3	4	3	4	4	4	5	4	4	4	4	4	4	4	4	4	3	3	4	3	4	4	5	3	4	4	4	4	4	4	4	4	4	5	5	4	4	4	3	3	4	3	4
1	1	1	0	3	4	4	3	5	3	4	4	5	4	4	4	4	3	3	4	4	3	4	4	4	4	4	4	4	4	5	5	5	5	3	5	4	4	3	4	4	4	4	4	5	5	4
0	3	4	1	1	3	3	4	3	3	3	3	3	5	3	3	4	4	4	3	3	2	3	2	3	3	4	5	5	5	5	5	5	5	5	5	5	5	5	5	5	5	5	5	5	5	5
0	3	4	1	1	3	3	4	3	3	3	3	3	1	3	3	4	4	4	3	3	2	3	2	3	3	4	5	5	5	5	5	5	5	5	5	5	5	5	5	5	5	5	5	5	5	5
1	2	3	0	1	3	4	3	4	4	3	4	3	3	3	3	3	4	3	5	2	2	2	2	1	2	3	2	2	3	4	3	3	3	4	4	4	4	4	3	4	4	3	3	3	2	3
1	2	3	1	2	5	5	5	5	5	5	5	5	4	5	5	5	5	5	5	5	5	5	5	5	5	5	5	5	5	5	5	5	5	5	5	5	5	5	5	5	5	5	5	5	5	5
0	3	2	1	4	3	3	3	4	4	4	3	4	3	3	2	3	1	1	1	3	1	1	1	1	1	1	1	1	1	1	3	1	1	1	2	1	1	2	3	3	2	1	1	1	1	1
0	1	3	0	2	4	4	4	4	4	4	4	4	1	4	4	4	4	4	4	4	4	4	4	4	4	4	4	4	4	4	4	4	4	4	4	4	4	4	4	4	4	4	4	4	4	4
0	2	1	1	3	5	3	3	4	3	5	4	5	4	5	5	4	3	3	4	4	4	3	4	4	4	4	3	4	5	4	4	4	5	4	4	4	3	3	3	4	3	3	3	3	3	1
1	2	3	0	4	5	5	4	5	4	5	5	5	4	5	5	5	4	5	5	5	5	5	5	4	5	5	5	5	5	5	5	5	5	5	5	5	3	3	4	4	5	3	5	5	5	5
1	1	3	0	3	4	4	4	4	5	4	4	4	3	4	4	4	4	4	4	4	4	4	4	4	4	4	4	4	4	4	4	4	4	4	4	4	4	4	4	4	4	4	4	4	4	4
0	1	3	0	1	4	4	4	4	4	5	4	4	4	4	4	4	4	4	4	4	5	3	3	4	5	4	4	5	4	4	4	4	4	4	4	5	4	4	5	4	3	4	4	4	4	4
0	2	3	0	1	5	4	4	5	4	4	4	5	4	5	5	5	5	4	5	4	3	5	4	4	4	4	4	4	4	4	5	4	5	5	5	4	4	4	4	5	5	3	4	5	4	4
1	2	1	0	3	5	5	4	5	4	5	5	5	5	5	5	5	4	4	5	5	2	2	3	4	4	4	4	2	3	4	3	4	4	4	4	3	2	5	3	3	3	2	4	3	3	4
0	1	3	0	1	4	4	4	4	4	4	4	4	4	5	5	4	4	4	4	4	3	3	4	4	4	4	4	4	4	4	4	5	5	4	4	4	4	4	4	4	4	5	4	4	4	5
0	4	4	1	4	3	3	3	3	3	5	3	5	2	5	5	3	1	1	3	2	2	3	4	3	3	3	3	3	3	3	3	3	3	3	4	4	3	4	3	3	4	3	3	3	3	3
0	3	1	1	1	5	5	5	5	5	5	5	5	4	5	5	5	5	5	5	5	5	5	5	5	5	5	5	5	5	5	5	5	5	5	5	5	5	5	5	5	5	5	5	5	5	5
0	2	3	0	3	4	4	4	4	4	4	4	4	3	3	3	3	3	3	5	4	3	3	3	4	4	3	3	3	3	4	4	5	5	5	5	5	3	5	3	4	4	4	3	3	3	2
1	2	1	0	4	5	5	5	5	4	5	5	5	5	4	4	4	4	4	5	3	2	2	4	4	5	4	4	5	5	5	3	4	3	5	5	4	4	4	4	3	4	3	3	5	5	3
0	4	4	1	4	4	4	3	4	4	4	4	4	5	4	4	3	3	3	4	4	3	3	4	3	4	4	4	3	4	4	4	4	3	4	4	4	4	4	4	4	4	3	4	4	4	4
0	4	4	1	4	4	4	4	5	4	4	4	4	4	4	3	3	3	4	4	3	4	4	4	4	4	4	3	4	3	4	4	4	3	4	3	4	4	4	4	4	4	3	3	4	4	3
0	4	4	1	1	3	3	3	3	3	3	3	3	4	3	3	3	3	3	3	3	3	3	3	3	3	3	3	3	3	3	3	3	3	3	3	3	3	3	3	3	3	3	3	3	3	3
0	2	3	1	3	5	5	5	5	5	5	5	5	5	5	5	5	3	4	5	4	3	4	5	5	5	5	5	5	5	5	5	5	5	5	5	5	5	5	5	5	5	5	5	5	5	5
0	2	1	0	3	5	3	3	5	2	4	4	5	3	4	4	3	2	1	5	5	4	2	4	5	5	5	3	2	4	2	4	4	3	5	5	4	3	5	3	3	3	3	2	5	5	3
0	2	1	0	3	5	3	3	5	2	4	4	5	4	4	4	3	2	1	5	5	4	2	4	5	5	5	3	2	4	2	4	4	3	5	5	4	3	5	3	3	3	3	2	5	5	3
0	2	1	0	3	5	3	3	5	2	4	4	5	3	4	4	3	2	1	5	5	4	2	4	5	5	5	3	2	4	2	4	4	3	5	5	4	3	5	3	3	3	3	2	5	5	3
0	2	3	0	2	3	3	3	3	3	4	4	4	4	4	3	4	3	3	3	4	4	5	5	4	4	3	3	4	3	3	3	3	3	4	3	3	4	3	4	3	4	4	4	4	4	3
0	2	3	0	2	3	3	4	5	4	4	5	5	2	4	4	4	4	4	5	5	4	4	4	4	5	5	5	3	4	5	5	4	5	4	4	4	3	4	4	4	4	3	3	5	4	4
1	2	1	1	2	5	5	5	5	5	5	5	5	4	5	5	5	5	5	5	5	5	5	5	5	5	5	5	5	5	5	5	5	5	5	5	5	5	5	5	5	5	5	5	5	5	5
1	2	3	0	4	3	3	3	3	3	3	3	3	2	3	3	3	3	3	3	3	3	3	3	3	3	3	4	3	3	3	3	3	3	3	3	3	3	3	3	3	3	4	3	3	3	3
0	2	3	0	3	4	4	4	5	4	4	4	5	3	4	4	3	4	5	5	5	4	4	4	3	4	3	3	3	4	3	4	4	4	4	4	5	4	4	4	4	4	3	4	5	5	3
0	1	1	0	1	3	4	3	4	3	4	4	4	3	4	4	3	4	3	3	3	3	3	3	3	3	3	3	3	3	3	3	3	4	3	3	3	3	3	3	3	4	3	3	3	3	2
0	2	3	1	2	5	4	4	5	5	5	5	5	2	5	5	5	4	4	5	5	4	4	4	5	5	5	3	4	4	5	3	4	3	4	4	4	4	4	5	5	5	4	3	4	5	4
0	2	3	1	3	4	4	4	4	3	4	4	4	3	4	4	3	1	1	5	2	1	1	4	4	1	3	3	4	4	4	4	4	4	4	4	4	4	4	4	5	5	3	3	4	3	3
1	2	3	1	4	5	3	4	5	4	4	3	5	2	5	4	4	2	4	5	4	4	4	4	5	3	4	3	4	5	5	3	3	3	4	4	4	4	5	4	4	3	2	3	4	5	4
1	2	1	1	4	4	4	4	5	5	5	5	5	5	5	5	4	5	5	5	5	5	5	5	5	5	4	5	5	5	5	5	5	5	5	5	4	3	5	4	5	5	5	4	5	5	4
0	3	4	1	4	5	4	4	5	5	5	4	5	4	5	4	4	4	4	5	4	3	4	4	4	4	4	4	4	4	5	4	4	4	4	4	4	4	4	5	5	4	5	5	5	5	5
0	2	3	1	3	5	5	3	5	4	3	3	4	2	3	3	2	4	3	5	5	4	2	3	5	4	5	3	3	5	5	3	5	3	4	4	3	4	5	4	3	3	1	2	5	3	4
1	4	5	1	4	5	5	3	4	4	4	4	4	3	4	4	4	3	3	2	2	2	3	3	3	3	3	3	3	3	3	3	3	3	3	3	3	3	3	3	3	4	3	3	3	3	3
0	1	1	0	2	5	4	4	5	5	4	4	5	4	4	4	4	4	4	4	3	3	4	4	4	4	4	4	4	4	4	4	4	4	4	4	4	4	4	4	4	4	3	3	5	5	3
1	2	3	1	4	5	5	5	5	4	5	5	5	4	5	5	4	5	5	4	4	3	4	3	5	4	4	5	5	5	5	5	4	4	4	4	4	4	5	4	4	4	4	5	5	5	3
1	2	1	0	1	5	5	5	5	4	4	4	4	5	5	5	5	5	5	5	5	5	5	5	5	5	5	5	5	5	5	5	5	5	5	3	5	2	5	5	5	5	4	4	5	5	5
1	2	3	0	2	5	5	5	5	5	5	5	5	4	5	5	5	5	5	5	5	5	5	4	4	5	4	5	3	3	4	5	4	5	4	5	5	4	3	4	4	4	3	2	4	4	3
1	2	1	1	3	4	4	4	5	4	4	4	4	3	4	4	4	4	3	4	3	3	4	4	3	4	4	3	4	4	4	3	4	4	3	3	3	4	4	4	5	4	3	3	4	4	4
1	3	3	1	4	5	5	5	5	3	5	4	5	5	5	5	5	4	3	4	3	2	3	4	5	4	4	4	3	4	4	3	4	4	4	4	4	4	4	4	3	3	1	1	1	3	1
1	2	1	0	4	4	4	4	4	4	4	4	3	3	4	4	3	4	4	4	4	4	4	4	4	3	4	3	4	4	4	4	3	4	5	3	4	5	5	4	4	4	4	4	4	4	5
1	4	1	1	1	4	4	4	4	4	4	4	4	2	4	4	4	4	4	4	3	4	4	4	4	4	4	3	4	4	3	4	4	4	4	4	4	4	4	4	4	4	3	4	4	4	4
0	2	1	1	4	5	5	4	5	5	5	5	5	4	5	5	5	4	4	5	5	5	5	5	5	3	5	5	4	5	5	5	5	5	5	4	5	5	5	5	5	5	5	5	5	5	5
1	2	3	1	3	4	4	3	4	4	3	3	4	3	3	3	3	3	4	4	4	4	4	4	5	4	4	4	3	4	3	4	4	5	4	4	4	4	4	4	4	4	3	3	3	4	4
1	2	1	1	3	3	3	2	4	2	5	2	4	2	3	3	5	2	2	3	2	2	2	3	2	3	2	3	3	2	4	4	4	4	2	3	4	2	3	2	2	2	2	2	2	3	2
1	2	1	0	2	5	5	4	5	5	5	4	5	2	5	5	4	2	4	5	5	5	5	5	5	4	4	4	4	4	4	3	3	3	4	4	4	4	4	4	4	4	3	5	5	5	4
0	1	1	0	4	5	5	5	5	5	5	5	5	3	5	5	5	5	5	5	3	5	5	5	3	5	5	3	3	5	5	5	5	5	5	3	5	3	5	3	5	5	3	3	3	5	3
1	2	3	1	4	5	5	5	5	5	5	5	5	5	5	5	5	5	5	5	5	5	5	5	5	5	5	5	5	5	5	5	5	5	5	5	5	5	5	5	5	5	5	5	5	5	5
0	2	3	0	3	5	5	5	5	4	5	5	5	4	5	5	5	5	5	5	3	4	3	4	4	5	5	5	5	5	5	5	5	5	5	5	5	4	5	5	5	5	5	5	5	5	5
0	2	3	0	4	3	3	4	4	3	5	4	4	3	4	5	2	3	4	5	5	5	4	2	4	3	4	2	4	4	4	5	5	5	5	5	5	4	4	5	5	5	3	1	1	4	3
1	2	4	1	4	5	5	5	5	5	5	5	5	4	5	5	5	5	5	5	5	4	4	5	5	5	5	3	3	5	5	5	5	3	5	5	5	3	5	5	3	3	3	3	5	5	4
1	4	1	1	4	5	5	5	5	4	4	5	4	4	4	4	4	3	3	4	4	4	4	4	4	4	4	3	5	5	5	4	4	4	5	4	4	4	5	5	4	4	3	4	5	5	4
1	2	4	1	4	5	5	5	5	5	5	5	5	3	5	5	5	5	5	5	5	4	4	5	5	5	5	3	3	5	5	5	5	3	5	5	5	3	5	5	3	3	3	3	5	5	4
0	2	1	0	1	5	4	4	5	3	5	5	5	3	5	5	4	4	3	5	5	5	5	5	5	4	5	4	5	5	5	5	5	4	5	4	4	4	4	4	4	4	3	3	5	5	2
1	2	3	0	3	5	5	5	5	5	5	5	5	4	5	5	5	5	5	5	5	5	5	5	5	5	5	5	5	5	5	5	5	5	5	5	5	5	5	5	5	5	5	5	5	5	5
1	2	3	1	4	5	5	3	4	5	5	5	5	3	5	5	3	3	3	4	3	3	3	3	3	3	3	3	3	3	3	3	3	3	3	3	3	3	4	5	5	5	4	3	5	4	3
1	3	5	1	4	4	4	4	4	4	4	4	4	5	4	4	4	3	3	4	4	3	3	4	4	4	4	4	4	4	4	4	4	4	4	4	3	3	4	4	4	4	3	3	4	4	3
1	3	3	1	4	3	2	2	4	2	1	1	1	5	2	3	2	3	3	4	4	2	5	2	4	3	4	2	1	3	1	4	2	2	4	3	4	4	3	3	3	2	2	1	1	2	2
0	3	4	1	2	4	4	5	5	3	3	4	4	5	3	3	4	4	4	5	5	4	4	3	3	3	3	4	3	5	4	3	3	3	4	4	4	4	4	3	3	4	3	3	3	3	3
0	2	4	1	4	3	4	3	4	3	4	4	5	4	5	5	4	3	5	4	2	2	3	4	3	4	4	4	4	4	4	4	4	3	4	4	4	4	4	4	4	4	2	3	4	4	3
1	2	3	0	4	5	5	4	5	5	5	5	5	4	5	5	5	3	3	5	5	5	5	5	5	5	5	5	5	5	5	5	5	5	5	5	5	5	5	5	5	5	5	5	5	5	3
0	2	3	1	4	5	5	5	5	5	5	5	5	2	5	5	5	5	5	5	5	3	5	5	5	5	5	5	5	5	5	5	5	5	5	5	5	5	5	5	5	5	5	5	5	5	5
0	3	4	1	4	5	5	5	5	5	4	4	4	3	4	4	4	3	3	3	3	3	3	4	4	3	3	3	4	4	5	3	3	2	3	4	3	3	4	4	4	4	3	3	5	4	3
0	2	4	1	4	5	5	5	5	5	5	4	5	3	4	4	4	5	2	5	4	2	5	5	5	5	5	2	3	4	4	2	2	1	2	2	2	4	4	4	4	4	4	1	5	4	1
0	2	3	0	2	5	5	4	5	5	5	5	5	4	4	5	4	4	4	5	4	4	4	4	4	4	4	4	4	4	4	4	4	4	4	4	5	4	4	4	4	4	4	4	4	4	4
1	2	3	0	3	4	4	4	3	5	3	3	3	5	5	4	3	2	3	5	2	3	3	4	3	3	4	4	3	3	4	4	4	5	4	4	5	3	4	4	3	4	3	3	3	2	3
1	2	4	1	4	5	5	5	5	5	5	5	5	4	5	5	5	5	5	5	5	5	5	5	5	5	5	5	5	5	5	4	5	5	3	5	5	4	5	5	5	5	5	5	5	5	1
0	4	3	1	1	4	4	4	4	4	4	4	4	4	2	3	3	2	4	3	2	3	3	5	3	2	3	3	4	3	3	3	3	3	3	3	3	3	3	3	3	3	3	3	3	3	3
1	2	3	1	4	5	5	5	5	5	5	5	5	4	5	5	5	3	3	5	5	5	5	5	5	5	5	5	5	5	5	5	5	5	5	5	5	5	5	5	5	5	5	5	5	5	1
1	3	1	1	4	5	5	5	5	5	5	5	5	3	5	5	5	5	5	5	5	5	5	5	5	5	5	5	5	5	5	5	5	5	5	5	5	5	5	5	5	5	5	5	5	5	5
0	3	4	1	4	5	5	5	5	5	5	5	5	5	5	5	5	5	5	5	3	3	4	5	5	3	5	5	5	5	5	4	4	3	4	4	4	4	4	4	4	4	3	4	4	4	4
1	2	2	1	4	5	5	4	5	4	5	5	5	3	5	4	3	2	2	3	2	3	2	5	4	5	5	3	4	4	4	4	4	4	5	5	4	4	4	5	5	4	4	4	4	4	4
1	2	3	1	2	4	4	4	3	3	3	4	3	5	3	3	3	4	3	3	2	2	2	3	3	3	3	2	2	4	3	4	3	4	3	3	4	4	4	4	3	3	4	3	3	4	4
1	2	3	1	4	5	3	3	5	5	5	5	5	5	5	4	5	2	3	5	2	2	5	4	3	5	5	5	5	5	5	5	5	5	5	5	5	4	5	5	5	5	3	1	2	5	5
1	4	4	1	4	5	5	4	5	4	5	4	5	4	4	4	5	1	2	3	3	3	2	4	4	4	4	3	3	3	3	4	4	3	3	3	3	4	4	4	4	4	3	4	5	3	1
0	2	3	0	1	5	4	5	5	4	4	5	5	3	5	4	5	4	4	4	4	4	3	4	4	4	4	4	4	4	5	5	4	4	3	2	5	5	5	4	5	4	4	5	5	3	2
0	2	3	0	2	4	4	5	5	4	4	4	4	5	3	3	3	4	5	5	3	3	5	3	4	5	5	5	5	5	5	5	5	5	5	5	4	5	5	5	4	5	2	3	5	4	3
1	3	4	1	4	4	4	4	5	4	4	4	4	4	4	4	3	3	3	4	3	2	3	4	3	4	4	4	4	4	4	4	4	4	4	4	4	4	3	3	4	4	3	4	4	3	3
1	4	4	1	2	4	4	4	5	4	4	4	3	4	3	3	3	4	4	3	3	3	4	3	3	4	3	4	3	4	3	3	3	3	4	4	4	4	4	4	4	4	3	3	4	4	4
1	2	3	0	2	4	4	4	4	3	4	4	4	3	4	4	3	4	4	4	4	3	4	4	4	4	4	4	4	4	4	4	4	4	4	4	4	4	4	5	4	4	4	4	4	4	4
0	4	5	1	4	5	5	5	5	5	5	5	5	5	5	5	5	1	1	5	4	5	5	5	5	4	4	4	4	4	4	4	4	4	4	4	4	4	5	5	5	5	5	5	5	5	5
0	2	3	1	4	3	3	3	3	3	3	3	3	3	3	3	3	3	3	2	1	1	1	3	3	3	3	3	3	3	3	3	3	3	3	3	3	2	3	2	2	2	1	1	1	1	1
1	2	4	1	1	4	5	5	4	4	4	5	4	5	3	3	3	4	4	3	3	3	3	3	3	3	4	3	3	3	3	3	4	3	3	3	3	3	3	3	3	4	3	3	3	3	3
1	4	1	1	4	5	4	4	5	5	5	4	5	4	5	4	5	4	4	5	5	4	4	4	4	4	5	4	5	5	5	4	5	5	5	5	5	5	5	5	5	5	4	4	5	4	4
0	2	3	1	4	5	5	5	5	4	5	5	5	4	5	5	4	3	3	3	2	3	3	5	5	4	5	4	4	4	5	4	4	5	5	4	5	5	5	4	4	5	3	4	5	4	3
1	4	3	1	2	5	3	2	4	2	2	3	3	4	3	3	4	2	2	4	2	2	1	3	3	3	3	2	2	2	4	3	3	3	5	3	3	3	5	3	3	3	2	2	2	4	1
0	2	1	1	4	4	4	4	4	4	4	5	5	3	4	4	4	4	4	4	4	4	4	4	4	4	4	4	4	4	4	4	4	4	4	4	4	4	4	4	4	4	4	4	4	4	4
0	2	3	1	4	5	5	4	4	3	4	5	4	3	4	4	4	4	5	5	5	3	4	5	3	5	5	2	2	3	3	2	3	5	5	5	4	4	5	4	4	3	1	2	5	3	1
0	4	2	1	4	4	4	4	5	5	4	4	4	4	4	4	4	4	3	3	4	3	3	4	4	3	4	3	3	4	4	3	3	3	4	4	4	4	4	4	4	4	4	3	4	4	4
1	4	4	1	4	5	5	5	5	5	4	5	5	3	5	4	5	4	4	4	4	4	4	5	5	4	4	4	5	4	5	4	5	4	5	5	4	4	4	5	5	4	4	4	5	5	4
1	2	3	0	2	3	4	4	4	4	4	4	4	3	4	4	4	4	5	4	4	4	4	4	4	4	4	4	4	4	4	4	5	4	4	4	4	4	4	4	4	4	4	4	4	4	4
1	2	1	0	2	5	5	3	5	5	5	5	5	5	5	5	5	5	5	5	5	5	5	5	5	5	5	5	5	5	5	5	5	5	5	5	5	5	5	4	4	4	4	4	4	4	4
0	2	1	0	1	5	5	5	5	5	3	4	4	4	5	4	5	4	5	5	5	4	4	4	4	5	3	5	5	5	5	4	5	4	4	5	5	5	4	4	4	5	4	5	5	5	5
0	2	3	0	1	2	3	3	5	3	2	2	3	5	2	2	3	2	2	5	2	1	2	2	2	3	2	2	2	2	2	2	4	2	3	4	4	2	4	2	2	2	1	2	1	1	2
0	4	4	1	4	4	4	4	4	4	4	4	4	3	4	4	4	3	3	4	3	2	4	4	4	4	4	4	4	4	4	4	4	2	3	4	4	3	4	3	3	4	3	4	4	3	3
1	2	1	0	1	5	5	4	5	4	4	4	4	4	4	4	5	4	4	5	3	3	3	3	4	4	4	3	3	4	3	4	4	4	5	4	4	3	4	3	4	3	3	2	3	3	1
1	2	3	1	3	5	5	4	4	4	4	5	4	3	5	5	5	4	5	5	4	4	5	5	5	4	4	5	4	4	4	5	5	5	5	5	4	4	3	4	4	5	4	4	4	4	3
0	2	3	0	2	3	2	3	2	5	2	5	1	3	2	4	3	3	3	3	2	2	5	3	3	2	3	1	1	3	2	3	4	2	3	3	2	3	3	2	3	3	2	3	4	2	3
0	2	3	0	2	5	5	4	5	5	5	4	4	5	4	4	3	4	4	4	4	4	4	4	5	4	4	3	4	4	5	5	5	5	5	4	4	5	5	4	5	5	3	4	5	4	4
1	1	3	0	3	5	5	5	5	4	3	4	4	2	4	4	4	5	5	5	3	3	4	5	4	4	5	3	4	4	5	5	5	4	5	5	5	4	5	5	5	5	5	5	5	5	5
1	2	3	1	4	5	5	5	5	5	5	5	5	3	5	5	5	5	5	5	5	3	5	5	4	4	5	5	5	5	5	5	5	5	5	5	5	5	5	5	5	5	5	5	5	5	1
1	2	3	0	2	3	3	3	3	3	3	3	3	5	3	3	3	3	3	3	3	3	3	3	3	3	3	3	3	3	3	3	3	3	3	3	3	3	3	3	3	3	3	3	3	3	3
1	1	3	0	1	3	3	3	4	4	3	4	3	3	3	5	4	3	3	5	2	1	4	4	4	4	3	3	4	5	4	5	5	4	5	4	4	5	5	3	5	3	4	4	5	5	3
0	1	3	0	1	3	3	4	4	4	2	2	4	3	3	3	4	3	3	3	3	2	3	3	2	2	2	2	2	2	3	3	2	2	3	2	3	3	4	3	3	3	2	2	2	2	2
0	2	3	0	3	5	5	5	5	5	5	5	5	3	5	4	4	3	4	3	3	3	4	4	3	4	3	4	3	4	4	3	4	3	3	3	4	4	4	3	3	2	2	2	4	4	4
0	2	3	0	1	4	4	4	4	4	4	4	4	3	4	4	4	4	4	5	3	2	2	3	3	4	4	4	3	4	5	5	4	4	5	5	5	3	3	3	3	3	2	2	2	2	4
1	2	3	0	2	5	2	4	5	4	5	5	5	3	5	5	4	4	4	5	5	3	4	5	5	5	5	5	5	5	4	5	5	4	5	4	5	5	5	4	5	5	4	3	4	5	2
1	1	3	0	1	4	3	5	5	5	4	5	4	3	5	4	4	3	3	4	3	4	2	3	2	3	2	3	2	5	5	4	5	4	3	4	4	4	3	5	5	4	3	3	5	3	2
1	1	3	0	1	4	3	3	3	3	4	4	4	4	4	4	3	3	2	4	3	3	3	3	4	3	3	2	2	2	4	4	3	3	3	3	4	3	4	3	4	4	3	4	4	4	2
0	2	3	1	1	4	4	3	5	3	3	3	3	4	3	3	4	3	3	5	4	3	3	4	4	4	4	3	3	3	3	3	3	3	4	3	3	4	4	3	3	3	3	3	3	3	3
1	2	3	0	2	3	3	3	3	3	3	4	2	3	2	2	3	2	3	3	3	3	2	3	3	3	2	3	3	3	3	2	2	3	2	4	3	3	3	3	3	3	3	3	3	4	4
1	1	3	0	4	5	4	5	5	4	5	5	5	3	5	5	5	5	5	5	3	3	3	4	4	5	5	5	5	5	5	4	4	4	5	5	5	5	5	5	5	5	3	4	5	5	4
0	2	3	0	3	3	3	3	3	3	3	3	3	2	3	3	3	3	2	3	3	3	2	3	3	2	2	3	3	2	3	3	3	3	3	3	3	3	3	3	3	3	3	3	2	2	2
0	1	1	0	1	5	5	5	5	5	5	5	5	4	5	5	3	4	5	5	3	5	5	5	5	5	4	5	5	5	5	5	5	5	4	5	5	5	5	4	5	5	5	5	4	4	4
1	2	1	0	3	4	4	4	4	4	4	4	4	1	4	4	4	4	4	4	4	4	4	4	4	4	4	4	4	4	4	4	4	4	4	4	4	4	4	4	4	4	4	4	4	4	4
0	2	3	0	4	3	4	3	2	5	2	4	3	3	3	4	3	3	4	3	2	3	2	5	3	2	5	4	4	4	3	4	4	4	4	4	3	3	3	4	4	5	4	5	3	4	4
1	2	1	1	4	4	5	4	4	4	4	4	4	4	4	4	4	1	3	4	3	3	3	3	3	2	3	3	3	4	3	3	3	4	4	3	3	3	3	3	3	3	3	3	4	4	3
1	2	1	1	4	5	5	5	5	5	5	5	5	1	5	5	5	5	3	4	4	3	4	5	4	3	4	4	4	5	5	4	4	4	4	4	4	4	5	4	4	4	4	4	4	4	4
0	2	3	0	3	4	4	4	4	4	4	3	4	3	3	4	4	3	3	4	3	3	4	3	4	4	4	4	3	3	4	5	4	4	4	4	3	3	4	3	4	3	3	4	4	4	3
1	2	1	1	4	4	4	4	5	5	5	5	5	4	5	5	4	5	5	5	5	5	5	5	5	5	4	5	5	5	5	5	5	5	5	5	4	3	5	4	5	5	5	4	5	5	4
1	3	1	1	4	4	4	4	5	5	4	4	4	3	4	4	4	5	3	5	5	4	4	4	4	3	4	4	4	4	5	4	4	4	3	4	4	4	5	3	3	4	3	4	5	4	3
0	2	3	0	2	3	3	3	3	3	3	3	3	5	3	3	3	3	3	3	3	3	3	3	3	3	3	3	3	3	3	3	3	3	3	3	3	3	3	3	3	3	3	3	3	3	3
0	2	3	1	4	5	3	4	5	5	5	4	5	3	5	5	5	4	4	5	5	3	5	4	3	5	4	5	4	3	4	4	4	5	4	5	5	5	5	5	4	4	3	5	5	4	3
0	2	3	1	1	4	4	4	4	4	4	4	4	4	3	4	4	3	3	5	4	3	3	3	4	4	4	3	3	4	3	4	4	4	4	3	4	3	4	3	4	3	3	3	3	4	4
0	2	3	0	1	5	4	2	4	4	3	3	4	1	3	3	3	2	3	3	2	1	2	2	4	3	4	4	3	3	2	3	3	4	2	3	3	3	3	3	5	4	3	3	1	3	1
0	2	4	1	4	5	5	5	5	5	4	4	4	3	4	3	3	4	4	4	3	3	4	4	4	3	4	3	4	5	5	3	3	2	4	4	3	4	4	5	5	5	4	5	5	5	5
1	3	1	1	4	5	5	3	5	3	5	5	5	2	5	5	5	2	3	5	5	5	3	3	5	2	3	2	4	4	3	3	3	2	4	4	4	3	4	3	3	3	3	2	2	5	4
0	2	1	0	4	5	5	4	5	5	5	4	5	3	4	4	5	3	3	4	2	1	2	2	2	3	4	3	3	3	5	3	3	3	3	3	3	3	4	3	3	4	2	2	2	3	3
0	2	3	1	4	5	4	3	4	4	3	5	4	3	5	4	4	3	4	4	5	3	2	5	4	5	3	5	4	4	3	5	3	4	4	5	3	5	3	5	4	4	5	5	5	5	4
1	2	1	0	1	4	3	5	5	4	4	4	4	5	4	3	4	5	4	4	4	3	3	2	4	4	4	3	4	4	4	3	5	3	3	5	4	4	5	4	5	4	3	4	3	5	4
1	2	3	0	2	5	5	5	5	5	5	5	5	5	5	5	5	5	5	5	5	5	5	5	5	5	5	5	4	5	5	5	5	5	5	5	5	5	4	4	4	5	4	5	5	5	4
0	1	3	0	2	5	5	5	5	4	4	5	5	4	4	4	5	4	5	4	4	4	4	4	3	4	4	4	4	4	5	5	5	5	5	5	5	5	5	4	4	5	4	4	4	4	5
1	2	3	1	4	4	4	3	4	4	4	4	4	4	4	3	4	4	4	4	3	2	3	3	4	4	3	4	4	3	4	4	4	3	4	4	4	5	4	3	4	4	4	4	4	4	4
0	2	1	1	1	5	4	4	5	4	4	4	4	4	4	4	4	4	3	5	5	3	4	3	4	4	4	4	4	5	4	3	3	3	5	4	4	4	4	4	3	3	3	3	3	3	2
0	2	3	0	4	5	5	5	5	5	5	5	5	3	5	4	4	3	4	3	3	3	4	4	3	4	3	4	3	4	4	3	4	3	3	3	4	4	4	3	3	2	2	2	4	4	4
0	1	3	0	2	3	3	3	4	4	3	3	4	3	3	3	3	3	4	3	4	2	3	2	2	2	3	3	3	3	3	4	3	3	3	3	3	3	3	3	4	4	3	4	4	5	3
1	2	3	1	4	5	4	4	4	5	5	5	4	3	4	5	4	3	3	5	4	4	3	5	5	4	4	4	4	4	4	4	3	3	4	5	3	3	4	5	4	4	3	4	4	4	3
1	2	1	0	3	5	5	5	5	5	5	5	5	4	5	5	5	4	4	4	3	3	4	4	5	5	5	5	5	5	5	3	5	1	4	5	3	4	4	4	5	5	5	5	5	4	3
1	2	3	0	2	5	4	3	5	3	3	3	5	3	5	5	3	3	3	4	3	3	3	3	3	4	4	5	5	5	5	3	5	5	5	5	5	5	5	5	5	5	5	5	5	5	3
0	2	3	1	3	5	4	4	5	4	5	4	4	4	4	5	4	4	5	5	5	5	5	5	5	4	5	4	5	5	4	4	4	4	5	4	5	4	4	5	5	5	3	4	4	4	2
0	2	3	1	3	5	4	4	5	4	5	4	4	4	4	5	4	4	5	5	5	5	5	5	5	4	5	4	5	5	4	4	4	4	5	4	5	4	4	5	5	5	3	4	4	4	2
0	2	3	1	3	5	4	4	5	4	5	4	4	4	4	5	4	4	5	5	5	5	5	5	5	4	5	4	5	5	4	4	4	4	5	4	5	4	4	5	5	5	3	4	4	4	2
0	2	3	0	2	5	4	4	5	4	4	5	4	3	4	3	3	3	4	5	4	4	4	4	4	4	4	5	5	5	5	4	4	4	5	4	4	4	4	5	5	5	4	4	5	5	5
0	1	3	0	1	4	4	4	4	4	4	4	4	4	4	4	4	4	4	4	4	4	4	4	4	4	4	4	4	4	4	4	4	4	4	4	4	4	4	4	4	4	4	4	4	4	4
1	2	3	0	1	4	3	5	5	5	4	5	4	3	5	4	4	3	3	4	3	4	2	3	2	3	2	3	2	5	5	4	5	4	3	4	4	4	3	5	5	4	3	3	5	3	2
0	2	3	1	4	5	5	5	5	4	5	5	5	3	5	5	4	3	3	3	2	3	3	5	5	4	5	4	4	4	5	4	4	5	5	4	5	5	5	4	4	5	3	4	5	4	3
0	2	3	0	2	4	4	4	4	4	3	3	4	3	3	3	3	3	3	4	3	2	3	3	3	3	3	3	3	3	4	4	4	4	4	4	3	3	3	3	3	3	3	4	4	3	3
0	2	3	0	3	5	5	5	5	5	5	5	5	3	5	4	4	3	4	3	3	3	4	4	3	4	3	4	3	4	4	3	4	3	3	3	4	4	4	3	3	2	2	2	4	4	4
1	3	1	1	1	5	5	5	5	5	5	5	5	5	5	5	5	5	5	5	5	4	5	5	5	5	5	5	5	5	5	5	5	5	5	5	5	5	5	5	5	5	5	5	5	5	5
0	1	3	0	2	2	4	4	4	5	3	3	3	4	3	4	3	4	3	5	3	2	4	4	4	4	4	4	4	3	3	4	4	3	3	3	3	3	3	3	4	3	3	4	3	4	3
0	1	3	0	2	2	4	4	4	5	3	3	3	4	3	4	3	4	3	5	3	2	4	4	4	4	4	4	4	3	3	4	4	3	3	3	3	3	3	3	4	3	3	4	3	4	3
0	2	4	1	4	5	5	5	5	5	4	4	4	4	4	3	3	4	4	4	3	3	4	4	4	3	4	3	4	5	5	3	3	2	4	4	3	4	4	5	5	5	4	5	5	5	5
0	1	3	0	2	3	3	3	4	4	3	3	4	3	3	3	3	3	4	3	4	2	3	2	2	2	3	3	3	3	3	4	3	3	3	3	3	3	3	3	4	4	3	4	4	5	3
1	2	3	0	1	5	5	4	5	4	4	4	4	4	4	4	5	4	5	4	3	3	5	4	2	3	3	3	3	4	5	5	5	4	5	4	4	5	3	4	5	5	2	4	1	3	3
1	2	3	1		5	5	5	3	5	5	4	4	4	5	5	5	4	4	4	3	3	3	4	4	4	3	3	4	4	4	2	2	2	4	4	3	4	4	4	4	4	4	4	5	4	4
1	1	1	0	1	5	5	5	5	5	5	5	5	2	4	3	3	2	3	5	2	1	5	4	1	3	3	4	5	5	5	3	5	3	5	5	5	5	5	5	5	5	5	5	5	5	3
1	2	3	1	3	5	5	5	5	5	5	5	5	5	4	4	5	5	3	5	4	3	5	4	5	4	5	5	5	5	5	5	5	3	4	2	2	3	4	4	4	4	4	3	4	4	3
1	1	1	1	3	5	5	5	5	5	5	5	5	5	5	5	4	5	5	5	5	1	4	5	5	3	5	4	4	5	5	5	4	4	4	4	4	5	5	5	5	5	5	5	5	5	5
1	1	1	1	1	4	4	4	4	3	3	4	4	3	4	3	4	3	3	4	3	3	3	4	4	3	4	3	3	3	3	4	4	3	3	4	4	3	4	3	4	4	3	5	5	5	3
1	1	1	0	1	5	5	5	5	5	5	5	5	5	5	5	5	5	5	5	5	5	5	5	5	5	5	5	5	5	5	5	5	5	5	5	5	5	5	5	5	5	5	5	5	5	5
0	1	3	0	2	4	4	3	4	4	5	4	4	3	4	4	4	3	3	5	5	5	4	4	3	5	4	4	4	4	4	4	4	4	4	4	4	4	4	4	4	4	4	4	4	4	4
0	2	1	1	1	4	4	4	4	4	4	4	4	4	4	4	4	4	4	4	4	4	4	4	4	4	4	4	4	4	4	5	5	5	4	4	4	4	4	4	4	4	4	4	4	4	4
1	2	1	1	4	4	4	4	5	4	4	4	4	3	4	4	4	3	3	4	3	3	3	4	4	4	4	3	3	4	3	3	3	3	4	3	3	3	4	3	3	3	2	3	4	4	3
0	2	1	1	2	5	5	5	5	3	5	5	5	5	5	5	5	5	5	5	4	3	5	5	3	5	5	5	5	5	5	5	5	5	5	5	5	5	5	5	5	5	5	5	5	5	5
0	1	1	1	1	3	3	2	4	3	2	3	4	3	2	3	2	3	3	4	3	2	3	2	2	3	3	3	3	3	5	5	4	3	3	3	2	3	4	4	4	4	2	3	4	3	3
0	2	1	1	2	5	5	5	5	5	5	5	5	5	4	5	5	5	5	5	4	4	5	4	5	5	4	5	5	5	5	5	4	4	5	5	4	4	4	5	4	5	4	5	5	5	3
1	1	1	1	1	4	4	4	4	4	4	4	5	5	4	5	5	5	4	5	3	3	4	5	4	4	4	4	4	4	4	4	5	4	4	5	5	4	5	5	5	5	4	4	4	4	4
1	1	1	0	1	4	4	3	4	4	4	4	4	4	4	4	4	4	4	4	4	4	4	4	4	4	4	4	4	4	4	4	4	4	4	4	4	3	3	4	4	4	3	3	3	3	3
1	2	3	1	4	5	3	4	5	4	4	3	5	2	5	4	4	2	4	5	4	4	4	4	5	3	4	3	4	5	5	3	3	3	4	4	4	4	5	4	4	3	2	3	4	5	4
0	2	3	1	4	4	4	3	3	3	4	4	4	2	3	4	3	2	2	3	3	3	3	4	4	3	3	3	2	3	3	4	4	4	4	3	4	3	3	3	3	3	2	3	4	3	2
0	1	1	0	3	5	3	3	5	4	5	4	5	3	3	4	5	3	2	3	1	1	3	2	3	4	3	5	5	5	5	5	5	5	5	3	3	2	4	3	3	4	2	2	2	5	3
0	2	3	0	1	4	4	4	4	4	4	4	4	4	4	4	4	4	4	4	4	4	4	4	4	4	4	4	4	4	4	4	4	4	4	4	4	4	4	4	4	4	4	4	4	4	4
1	1	1	1	2	4	4	3	5	4	4	5	5	4	5	5	4	4	3	4	4	2	3	4	3	2	3	3	3	5	3	5	4	4	5	4	4	4	4	4	4	3	2	4	4	4	3
0	2	3	0	2	4	5	4	5	4	5	3	5	3	5	5	4	3	4	4	3	3	3	3	4	3	3	4	4	4	4	3	3	4	4	3	3	3	4	3	4	5	3	3	3	2	3
0	2	1	1	4	5	5	5	5	5	5	5	5	5	5	5	5	5	5	5	5	5	5	5	5	5	5	5	5	5	5	5	5	5	5	5	5	5	5	5	5	5	5	5	5	5	5
1	1	3	0	1	4	3	4	5	3	4	5	5	5	5	5	5	5	4	5	5	4	4	3	4	4	4	5	4	5	5	5	5	5	5	4	4	4	4	4	4	4	4	4	5	5	4
0	2	3	0	4	5	4	5	5	5	5	5	5	4	5	5	5	4	4	5	3	3	5	5	5	5	4	5	5	5	5	5	5	5	5	5	5	5	5	5	5	5	5	4	5	5	5
0	1	3	0	1	5	2	2	5	3	3	3	3	3	3	3	3	3	3	4	4	3	3	3	3	3	3	3	3	3	3	3	3	3	3	3	3	3	3	3	3	3	3	3	2	3	3
0	2	3	0	4	5	5	5	5	5	4	4	4	5	4	4	5	5	4	5	4	4	4	4	4	4	4	5	5	5	5	5	5	4	4	4	4	4	4	5	5	5	4	4	5	4	4
1	1	3	0	1	1	2	2	2	2	2	2	3	3	2	2	3	3	3	3	3	3	3	3	3	3	3	3	3	3	3	3	3	3	3	3	3	3	3	3	3	3	3	3	3	3	3
0	2	3	0	2	4	4	3	4	3	4	4	4	4	4	4	3	4	4	3	4	3	3	2	1	2	2	2	2	2	3	3	3	3	3	3	4	3	3	3	3	3	3	3	3	3	3
1	2	3	0	2	5	3	3	5	3	5	5	5	1	5	5	5	1	1	4	3	2	5	5	4	2	2	3	3	4	3	1	1	1	4	3	1	4	5	5	4	4	2	2	2	3	4
0	1	1	0	3	4	3	4	4	2	2	4	2	2	2	3	3	2	2	2	1	1	2	1	1	2	2	3	1	1	4	2	2	1	1	1	2	3	4	2	3	2	2	2	4	3	5
1	1	1	0	2	5	5	3	5	4	5	3	4	3	4	4	4	3	3	4	3	3	3	4	5	4	4	2	3	4	4	3	4	2	3	3	3	4	5	4	4	3	3	3	5	5	2
0	2	3	0	3	4	5	5	5	5	5	5	5	5	5	5	5	5	5	5	5	5	5	5	5	5	5	5	5	5	5	5	5	5	5	5	5	5	5	5	5	5	5	5	5	5	5
1	1	1	0	2	4	4	3	4	4	3	4	3	4	4	4	4	4	4	3	4	3	3	3	3	4	3	3	3	3	4	4	4	3	4	3	4	3	4	4	3	4	3	4	3	4	3
0	1	3	0	2	5	4	4	5	4	4	4	4	3	3	3	4	3	3	5	4	4	3	5	4	4	5	3	3	5	4	2	3	4	4	5	4	4	4	4	4	4	3	4	4	4	3
1	2	3	0	2	5	3	3	3	3	3	3	3	3	3	3	3	3	3	3	3	3	3	3	3	3	3	3	3	3	3	4	3	3	3	3	3	3	4	3	3	3	3	3	2	3	3
0	1	1	0	1	5	4	4	5	5	5	5	5	2	5	5	4	2	3	5	5	3	3	3	3	3	3	3	3	3	4	3	3	4	3	4	5	5	5	4	5	5	5	5	5	5	2
1	2	3	1	4	5	5	5	3	4	5	5	5	3	5	5	3	3	3	5	4	3	3	5	4	4	5	5	5	5	5	4	4	4	5	5	5	5	5	5	5	5	5	5	5	5	3
1	1	4	0	2	4	4	4	5	4	4	4	4	5	3	4	4	5	4	5	3	3	3	4	4	4	4	3	4	4	5	4	4	4	5	4	4	4	4	4	4	4	3	3	4	3	4
0	1	3	0	2	4	4	4	4	4	4	3	4	4	4	4	4	4	4	4	3	3	4	4	4	4	4	4	3	4	4	3	3	3	3	4	4	4	4	4	4	4	3	4	4	4	3
0	2	3	0	4	5	4	4	5	5	4	4	5	3	5	4	4	3	4	5	3	4	4	4	4	4	4	4	3	4	4	5	4	5	4	4	5	4	3	4	4	3	3	4	5	5	3
0	1	1	0	2	5	5	4	4	4	4	4	4	3	4	3	4	3	4	4	3	3	3	3	2	4	4	3	4	5	4	4	5	5	5	4	4	3	4	4	4	4	3	3	5	5	3
0	1	3	0	1	3	4	4	5	5	4	5	4	4	4	4	4	4	4	4	3	3	3	4	3	4	4	4	4	5	5	5	5	5	4	4	4	4	4	4	4	4	4	4	4	4	4
0	2	3	0	4	5	4	4	5	5	4	4	4	5	3	4	5	5	4	5	3	3	2	2	3	4	2	4	4	4	4	5	5	4	4	4	4	5	5	4	5	5	4	4	5	5	4
0	1	3	0	2	4	4	4	4	4	4	4	4	4	4	4	4	4	4	4	4	2	4	4	3	4	4	4	3	3	3	4	4	4	4	4	4	4	4	4	4	3	3	3	3	3	3
1	1	1	0	1	3	3	3	3	2	2	3	3	3	3	3	2	3	3	2	1	1	1	2	1	2	2	2	1	1	2	3	2	2	2	2	2	2	1	2	2	1	1	1	1	1	1
0	1	1	0	4	5	5	4	5	5	4	5	5	3	5	5	4	3	4	5	3	4	3	4	3	3	3	2	4	5	4	4	5	3	4	3	3	4	4	4	4	5	5	3	5	5	3
0	1	1	0	2	4	4	4	5	4	4	4	4	4	3	4	4	4	3	4	3	2	4	4	4	4	4	4	4	4	5	5	4	5	4	4	5	5	5	4	4	4	3	3	3	3	3
1	2	3	1	4	5	5	5	5	5	5	5	5	3	5	5	5	3	3	5	3	3	1	5	5	4	5	5	5	5	5	5	5	5	5	5	5	5	5	5	5	5	5	5	5	5	1
1	2	1	0	2	3	3	3	3	3	3	3	3	3	3	3	3	3	3	3	3	3	3	3	3	3	3	3	3	3	3	3	3	3	3	3	3	3	3	3	3	3	3	3	3	3	3
0	1	1	0	4	5	5	5	5	3	5	5	5	3	5	5	4	3	3	4	5	5	4	5	5	3	5	4	4	5	5	5	5	5	4	5	5	3	5	4	4	4	3	5	5	5	3
1	3	3	1	1	4	4	4	4	4	4	3	4	4	4	4	4	4	4	5	3	3	3	3	3	4	4	3	4	4	4	4	4	4	4	4	4	3	4	4	4	4	3	3	3	3	4
1	2	3	0	4	5	5	5	5	5	5	5	5	5	5	5	5	5	5	5	5	5	5	5	5	5	5	5	5	5	5	5	5	5	5	5	5	5	5	5	5	5	5	5	5	5	5
1	2	3	0	2	5	3	2	5	2	3	3	4	2	4	3	4	2	3	4	5	2	3	4	3	3	2	1	2	2	5	3	4	5	2	3	4	2	3	5	4	2	4	3	5	3	2
1	2	3	0	3	4	4	4	5	3	5	5	5	4	5	5	4	4	3	5	5	4	4	5	5	4	5	3	4	4	5	4	4	3	5	4	5	4	5	4	4	4	3	5	4	4	3
1	2	3	0	3	4	1	1	3	5	5	5	5	5	5	2	5	5	5	5	5	2	1	3	5	3	3	4	3	2	2	4	5	3	5	4	3	5	5	5	3	2	1	1	1	5	1
0	1	3	1	2	3	4	5	5	4	4	4	4	4	3	4	4	4	4	4	2	2	3	4	4	4	4	4	5	5	4	4	4	4	3	5	3	3	5	4	3	3	3	3	5	5	5
1	1	3	0	2	4	3	3	4	3	3	4	4	4	3	4	3	4	4	5	5	4	4	4	3	3	4	4	4	5	4	3	4	5	5	4	5	3	4	3	4	4	3	4	4	3	3
0	1	3	0	2	3	4	5	5	4	4	4	4	4	3	4	4	4	4	4	2	2	3	4	4	4	4	4	5	5	4	4	4	4	3	5	3	3	5	4	3	3	3	3	5	5	5
0	1	3	0	2	4	4	4	5	5	5	5	5	3	4	4	4	3	3	4	4	3	3	3	2	3	2	2	2	4	1	5	5	5	5	5	5	5	5	5	5	5	5	5	5	5	4
1	2	1	1	4	4	4	4	4	4	5	5	5	5	5	5	5	5	5	5	3	3	5	3	5	4	5	4	4	5	4	3	4	2	4	4	3	4	4	4	4	4	4	5	4	5	4
0	2	3	0	1	5	5	4	5	4	4	4	4	3	4	4	4	3	1	4	3	2	1	1	3	3	3	3	3	3	5	3	3	3	3	4	4	3	3	3	5	5	4	1	2	2	1
0	2	1	0	1	5	5	5	3	3	3	3	4	3	3	3	3	3	3	3	2	2	2	3	3	4	3	4	4	3	5	3	3	3	3	3	4	3	3	3	3	3	3	3	3	4	5
1	2	1	0	4	5	5	4	5	4	4	3	4	3	4	4	5	3	4	4	3	3	3	4	4	4	4	3	3	3	4	4	4	5	4	4	4	3	4	4	4	4	2	4	4	4	3
0	2	3	0	2	3	3	3	4	2	4	4	4	3	4	4	4	3	3	5	4	4	4	4	4	3	3	3	3	3	4	3	3	2	3	3	4	3	4	3	3	3	2	3	2	3	3
0	2	3	0	3	5	4	5	5	5	4	3	4	4	5	4	5	4	4	4	4	4	5	5	3	4	4	3	4	4	5	4	4	4	5	4	4	4	5	5	5	5	4	4	5	5	3
0		3	0	2	5	5	4	5	4	4	4	4	4	4	5	5	4	3	5	5	3	4	4	4	4	4	5	4	4	5	5	4	4	5	4	4	4	4	4	4	4	4	5	5	5	4
0	1	3	0	1	4	4	4	4	4	4	4	4	4	4	4	4	4	4	4	4	4	4	4	4	4	4	4	4	4	4	4	4	4	4	4	4	4	4	4	4	4	4	4	4	4	4
0	2	1	0	1	5	5	5	5	4	5	4	4	4	4	4	5	4	5	4	3	4	5	4	4	4	4	5	4	4	4	4	4	5	4	4	4	3	3	3	4	4	4	3	3	4	3
1	2	1	1	1	1	1	1	1	1	1	1	1	1	1	1	1	1	1	1	1	1	1	1	1	1	1	1	1	1	1	1	1	1	1	1	1	1	1	1	1	1	1	1	1	1	1
1	1	3	0	4	5	5	5	4	5	5	5	5	4	5	4	5	4	4	4	4	4	4	4	4	5	4	4	4	4	5	5	5	3	5	4	4	3	5	4	5	4	5	4	5	5	5
1	2	1	0	4	5	5	4	5	5	3	4	4	3	4	3	3	3	3	5	2	3	3	4	4	2	3	3	3	4	4	3	4	3	4	4	4	3	4	3	5	4	3	3	5	4	4
1	2	3	0	1	3	4	3	4	3	3	4	3	3	3	4	3	3	4	5	3	4	3	4	3	4	3	3	3	3	4	3	5	3	4	4	3	4	3	3	3	3	3	4	4	3	3
0	2	1	0	1	5	4	4	5	5	4	4	5	4	5	4	3	4	4	5	5	3	4	3	3	3	3	3	3	3	3	4	4	3	3	3	3	3	4	4	5	4	4	4	4	4	3
0	1	3	0	1	2	3	2	2	3	2	2	2	2	2	3	2	2	3	2	2	3	3	2	2	3	3	2	2	2	2	3	2	2	2	2	2	2	3	2	2	2	2	2	2	2	2
1	2	3	0	3	4	4	2	3	4	5	5	5	2	5	4	3	2	3	5	4	4	4	4	5	4	5	4	4	4	5	5	4	4	3	3	4	4	4	3	4	4	3	3	5	4	2
1	3	1	1	1	4	4	3	4	5	5	4	5	3	5	5	4	3	3	4	3	3	3	4	4	5	4	4	4	4	4	5	4	4	4	4	4	4	4	5	5	5	5	4	4	4	4
1	2	1	0	2	4	4	4	5	3	4	4	4	4	4	4	4	4	4	4	4	3	4	2	3	4	4	3	3	3	3	4	5	5	5	4	4	5	4	4	4	4	4	4	4	5	5
0	2	3	1	4	5	5	3	5	4	5	5	5	4	5	5	5	4	4	5	4	3	3	5	5	5	5	5	5	5	5	4	4	5	5	5	5	5	5	5	5	5	1	5	4	5	1
1	2	1	0	1	4	4	4	5	4	4	5	4	4	4	4	5	4	4	5	3	5	4	5	4	4	4	4	4	4	4	4	4	4	5	4	5	4	5	4	5	5	5	5	5	4	4
1	2	1	0	1	2	3	5	4	2	1	2	2	4	3	2	3	4	4	5	3	2	1	3	4	2	1	1	3	3	2	5	4	2	4	4	1	5	2	4	2	1	4	3	5	3	2
0	2	3	0	2	5	3	4	4	4	5	3	4	4	4	4	4	4	3	4	4	3	3	4	3	3	3	3	3	4	4	3	4	4	3	4	4	4	3	3	3	3	3	3	4	4	3
0	1	3	0	1	4	4	5	4	4	3	4	4	4	3	3	4	4	4	4	4	4	4	5	4	4	4	4	4	4	5	5	5	4	4	4	4	4	5	4	4	5	4	5	5	5	4
1	1	3	0	1	3	4	3	4	4	2	3	2	3	3	4	3	3	3	4	4	2	3	3	3	4	4	4	4	4	3	4	4	4	4	4	3	3	4	4	4	4	2	4	3	2	4
0	1	1	0	2	4	4	4	4	4	3	4	3	3	3	3	4	3	3	4	4	3	4	4	4	4	4	4	4	3	3	4	4	4	3	4	4	5	4	4	4	4	4	4	4	4	4
0	1	3	0	1	3	3	3	3	3	3	3	3	3	3	3	3	3	4	4	3	2	3	3	3	4	3	3	3	1	4	5	4	4	3	3	3	3	3	4	3	3	3	3	3	3	3
1	3	1	1	4	4	4	3	4	3	5	4	4	3	5	5	4	3	4	5	4	3	3	4	4	4	4	4	3	3	4	3	3	3	3	3	3	4	4	4	5	4	3	3	3	4	4
0	2	3	0	3	5	5	5	5	4	3	5	5	5	5	5	5	5	5	5	5	5	5	5	5	5	5	5	5	5	5	5	5	5	5	5	5	5	5	5	5	5	5	5	5	5	5
0	2	3	0	4	5	3	3	5	5	5	5	5	4	5	5	5	4	4	4	4	3	4	4	4	4	4	4	4	4	4	4	4	4	4	4	4	4	4	4	4	4	4	4	4	4	4
1	3	4	1	4	5	5	3	5	5	4	4	4	4	4	3	4	4	4	4	3	4	4	3	3	3	3	4	4	4	5	3	4	4	3	5	4	5	5	4	4	5	5	3	4	5	4
0	1	1	0	1	4	4	4	4	4	3	3	3	4	3	3	4	4	4	3	3	2	2	2	2	3	2	2	2	3	2	4	4	4	4	4	4	3	4	3	3	3	2	4	3	3	3
0	1	1	0	4	4	4	5	5	5	4	4	4	4	5	5	4	4	4	4	4	4	4	4	4	4	4	4	4	4	4	4	4	4	4	4	4	4	4	3	4	4	4	4	4	5	4
0	4	4	1	4	5	4	4	5	5	5	5	5	3	5	5	5	3	3	4	4	4	1	4	4	4	4	4	4	4	4	4	5	4	4	4	4	4	3	4	4	4	4	4	5	5	2
0	3	3	1	4	4	4	4	4	3	4	4	4	3	5	4	4	3	3	5	3	3	3	4	4	5	4	3	4	4	3	3	3	3	4	3	3	3	3	4	3	3	3	4	4	4	3
0	3	3	1	1	3	3	3	5	5	3	3	3	1	3	3	3	1	5	5	3	1	3	3	3	5	3	3	3	3	3	3	3	4	3	3	3	3	3	3	3	1	1	1	1	1	3
1	4	3	1	1	1	4	4	4	4	4	4	4	2	4	4	2	2	2	2	2	2	2	2	1	2	2	2	2	2	2	2	2	2	2	2	2	2	2	2	2	2	1	2	2	2	2
1	1	1	0	4	4	4	3	3	3	3	5	4	3	4	4	4	3	5	4	5	3	4	5	4	4	4	3	4	3	4	4	3	5	3	5	4	4	3	5	3	4	4	5	3	4	4
0	2	1	1	1	3	3	2	4	4	5	5	5	1	5	5	5	1	1	5	4	3	1	2	1	3	3	3	2	3	2	2	2	2	5	2	4	3	3	2	2	2	1	2	1	2	1
1	2	1	0	4	5	4	4	4	3	4	4	4	4	5	4	4	4	3	4	4	2	4	4	4	4	5	3	4	4	5	4	4	3	4	4	4	4	5	4	4	4	4	4	4	4	4
0	1	3	0	1	3	4	4	5	5	4	5	4	4	4	4	4	4	4	4	3	3	3	4	3	4	4	4	4	5	5	5	5	5	4	4	4	4	4	4	4	4	4	4	4	4	4
0	1	1	0	3	5	5	5	5	5	5	4	5	4	4	4	4	4	4	4	3	3	4	3	4	3	4	3	5	4	3	4	3	4	3	5	5	3	5	3	4	4	3	3	5	5	3
1	2	1	0	2	5	5	5	5	5	5	4	4	4	5	5	4	4	5	5	5	4	4	5	5	5	5	5	5	5	5	5	5	5	5	5	5	5	4	4	4	5	5	5	5	5	2
0	1	1	0	4	5	5	4	5	5	4	5	5	3	5	5	4	3	4	5	3	4	3	4	3	3	3	2	4	5	4	4	5	3	4	3	3	4	4	4	4	5	5	3	5	5	3
0	2	1	0	1	3	5	1	5	5	5	5	5	5	5	5	5	5	5	5	4	4	3	4	4	4	4	4	5	4	4	4	4	4	4	2	5	4	4	4	4	4	4	4	4	4	4
1	1	1	0	4	5	5	5	5	5	5	5	5	5	5	5	1	5	4	5	4	5	5	5	3	4	4	5	4	4	5	5	5	5	5	5	5	5	5	5	4	5	5	4	5	5	5
0	1	3	0	1	4	4	3	5	5	4	4	4	3	4	4	4	3	3	5	3	1	3	4	4	4	5	4	3	4	4	4	4	4	4	4	4	4	4	4	4	4	3	3	3	3	4
0	2	3	0	1	5	5	5	5	5	5	5	5	4	5	5	2	4	4	4	4	2	4	4	3	3	5	3	4	5	5	5	5	5	5	5	5	5	5	5	5	4	3	4	5	2	3
0	1	3	0	2	5	5	4	5	5	5	5	5	5	5	5	5	5	5	5	5	3	5	4	4	4	4	5	5	5	5	5	5	5	5	5	5	5	5	5	5	5	4	3	5	5	4
0	1	1	0	1	5	5	4	4	4	4	4	4	4	4	4	4	4	4	4	4	4	4	4	3	4	4	4	3	5	4	3	3	3	3	5	3	4	5	3	3	3	3	3	4	3	3
0	2	1	0	1	5	5	4	4	4	3	3	2	4	2	2	2	4	4	4	4	3	3	3	3	3	2	3	4	4	4	3	3	3	3	3	3	4	4	4	4	4	4	4	4	4	4
0	1	1	0	1	3	3	3	3	3	3	3	3	3	3	3	3	3	3	3	3	3	3	3	3	3	3	3	3	3	3	3	1	1	2	2	1	3	2	3	3	3	2	3	3	3	3
1	1	3	0	3	5	5	5	5	4	4	4	5	4	4	4	5	4	4	5	5	4	3	4	3	5	3	4	4	4	5	5	5	5	5	5	5	4	5	4	4	4	3	4	5	5	3
0	2	3	0	1	4	4	4	4	3	3	4	3	3	3	4	4	3	3	5	3	4	4	2	4	2	4	3	4	5	4	2	4	3	4	3	4	3	4	3	5	4	3	4	4	3	4
0	1	3	0	1	3	3	3	5	5	5	4	4	4	3	3	4	4	3	5	3	2	2	5	2	3	3	4	4	5	3	5	5	5	5	5	4	4	3	3	4	4	4	4	4	5	4
0	1	3	0	1	4	4	4	4	4	4	3	4	4	4	4	4	4	4	4	4	4	4	3	4	3	4	4	3	4	4	4	4	4	4	4	4	4	5	5	4	4	4	4	4	5	5
1	2	3	0	4	4	4	5	4	5	5	5	5	5	5	5	5	5	5	5	5	4	4	5	4	5	5	4	5	5	5	5	5	5	5	5	5	5	5	5	5	5	5	5	5	5	5
0	1	1	0	1	4	4	5	5	4	3	4	4	4	4	4	4	4	4	4	4	4	4	4	4	5	4	4	4	4	4	4	4	4	4	4	4	4	4	5	4	4	4	4	5	4	4
0	1	3	0	2	5	4	4	5	4	4	4	4	4	4	4	4	4	4	4	3	3	3	3	3	4	3	3	4	4	4	5	5	5	4	4	4	4	4	4	4	3	4	3	4	4	3
0	2	1	0	4	4	3	3	4	3	3	3	4	2	3	3	2	2	3	4	4	3	3	3	3	3	3	3	3	3	4	3	3	2	3	3	3	3	3	4	4	4	3	4	4	4	4
0	2	3	0	2	4	4	3	4	4	4	5	4	4	4	4	4	4	4	5	4	4	4	4	4	4	4	4	4	4	4	4	4	4	4	5	4	4	5	5	5	5	4	4	4	4	5
1	1	3	0	2	4	4	4	5	5	5	5	5	5	4	4	4	5	5	5	5	5	5	5	5	5	5	5	5	5	5	5	5	5	5	5	5	5	5	5	5	5	5	5	5	5	5
0	1	3	0	3	4	4	4	4	5	4	4	4	4	4	4	4	4	4	5	5	4	4	4	4	5	4	4	3	4	5	5	5	5	5	5	5	5	3	4	4	4	4	4	5	5	4
1	2	3	0	1	4	4	5	5	4	4	4	4	4	4	5	4	4	4	4	3	1	3	3	3	4	4	4	4	4	4	4	4	4	3	4	4	4	4	4	4	4	4	4	4	3	4
1	2	3	0	2	4	4	3	5	3	5	4	5	3	5	5	5	3	3	4	4	2	2	3	4	3	4	4	4	3	4	4	4	4	4	3	4	4	3	4	5	5	3	4	3	2	2
0	2	3	0	2	4	4	4	5	4	5	4	4	3	4	4	4	3	3	4	4	4	4	4	4	4	4	4	4	4	4	4	4	4	4	4	4	4	4	4	4	4	4	3	5	4	4
0	1	3	0	2	3	5	4	5	5	5	5	5	4	4	4	4	4	3	4	3	1	4	4	4	4	3	5	5	5	5	4	5	4	5	5	4	5	4	4	5	4	4	4	4	4	4
0	1	1	0	3	5	4	4	5	5	5	5	5	3	5	3	3	3	3	5	5	5	5	5	4	5	4	5	5	5	5	5	5	5	5	5	5	5	5	5	5	4	3	5	5	5	3
0	2	3	0	2	4	4	4	4	4	4	4	4	4	4	4	4	4	4	4	4	4	4	4	4	4	4	4	4	4	4	4	4	4	4	4	4	4	4	4	4	4	4	4	4	4	4
0	2	3	0	2	4	4	4	4	4	4	4	4	4	4	4	4	4	4	4	4	4	4	4	4	4	4	4	4	4	4	4	4	4	4	4	4	4	4	4	4	4	4	4	4	4	4
0	1	3	0	2	4	4	5	4	4	5	4	4	4	4	4	3	4	4	5	5	4	4	4	5	4	4	5	3	5	4	5	4	4	4	4	4	4	5	4	4	5	5	4	4	4	4
0	1	3	0	1	5	5	5	5	5	5	5	4	4	4	5	5	4	5	5	5	1	5	4	4	5	5	5	5	5	5	5	5	5	5	5	5	5	5	5	5	5	2	5	4	5	3
0	1	3	0	3	5	5	5	5	5	5	4	4	5	4	5	5	5	5	5	5	3	4	3	3	4	4	4	3	4	5	3	4	4	5	3	5	5	3	3	5	5	3	3	5	3	4
0	2	1	0	3	5	5	5	5	3	4	3	4	4	4	4	3	4	4	5	4	3	3	3	3	4	4	3	3	3	4	4	4	4	4	5	4	5	5	4	4	5	4	3	5	5	5
0	1	3	0	2	5	4	5	5	4	5	4	5	4	4	5	5	4	5	5	5	5	4	4	5	4	4	4	5	4	4	5	4	4	4	4	5	5	5	5	5	5	5	5	5	4	5
0	2	1	0	2	5	5	5	5	4	5	5	5	3	4	4	4	3	4	4	4	3	4	3	4	5	5	4	4	4	5	5	5	5	5	5	5	4	5	4	4	4	3	3	5	5	3
1	1	3	0	1	4	4	4	4	5	4	4	4	4	4	4	5	4	4	5	4	3	4	4	4	4	4	3	3	4	5	5	4	4	4	4	4	3	5	3	4	4	3	4	5	5	5
0	2	3	0	3	5	5	3	5	4	4	3	4	2	4	4	5	2	2	3	3	3	4	3	3	3	4	4	4	4	5	5	5	5	5	5	5	4	3	4	4	4	4	4	5	5	4
0	2	1	0	4	5	5	5	5	4	5	5	5	5	5	5	5	5	5	5	5	5	4	5	5	4	4	4	4	4	5	4	4	4	5	5	5	5	5	5	5	5	3	5	5	5	3
0	1	3	0	1	4	4	4	4	4	4	4	4	4	4	4	4	4	4	4	4	4	4	4	4	4	4	4	4	4	4	4	4	4	4	4	4	4	4	4	4	4	4	4	4	4	4
0	2	3	0	4	3	4	3	5	5	4	3	4	5	4	4	5	5	5	4	3	2	3	3	3	4	4	4	3	4	4	4	4	3	4	3	5	4	3	4	4	4	3	5	4	4	4
0	1	1	0	2	4	4	3	4	4	3	4	4	2	3	4	4	2	2	4	3	3	2	2	4	4	4	2	3	3	4	4	4	3	4	4	4	4	4	4	4	4	2	4	3	4	2
0	2	1	0	3	4	4	4	5	4	4	4	4	1	4	4	4	1	4	4	4	4	4	4	4	4	4	4	4	4	4	4	4	4	4	5	4	4	4	4	4	4	4	4	4	5	5
0	2	1	0	3	4	4	4	4	4	4	3	4	4	3	3	4	4	4	4	3	3	4	3	4	4	4	3	3	3	4	4	4	3	4	4	4	4	4	3	4	4	3	3	5	4	3
1	1	3	0	2	4	4	3	4	4	4	4	4	3	5	4	4	3	3	5	4	3	3	3	3	4	4	4	3	3	5	4	5	5	4	4	5	4	4	4	4	4	3	4	4	4	4
0	2	3	0	4	5	4	4	5	4	5	3	4	4	4	4	3	4	3	4	4	3	4	3	4	3	4	3	4	4	4	4	4	4	4	4	4	4	3	3	4	4	3	4	4	4	3
0	1	3	0	1	4	3	4	3	3	3	3	3	3	4	3	4	3	3	4	3	4	3	4	4	3	4	4	4	3	4	4	3	4	4	4	4	4	3	3	3	3	3	3	4	3	3
0	2	3	0	3	4	3	4	5	5	4	5	4	3	3	5	3	3	4	3	3	3	2	4	4	4	3	4	3	4	5	3	3	3	4	5	4	4	4	4	3	4	3	4	4	5	2
1	1	1	0	2	5	5	5	5	5	5	5	4	3	4	4	5	3	5	5	3	1	2	4	4	4	4	4	4	4	5	5	5	5	5	5	4	4	4	4	4	4	4	4	3	4	4
0	2	1	0	4	4	3	3	5	3	4	3	4	3	4	4	3	3	3	4	4	1	1	1	1	3	2	3	3	3	3	3	3	3	3	3	3	2	4	2	1	1	1	1	1	3	1
0	1	1	0	2	5	3	2	5	3	4	3	5	3	4	4	4	3	3	4	5	4	3	3	2	3	3	3	3	3	4	4	4	4	4	4	3	4	3	3	3	3	2	3	5	4	4
0	2	3	0	4	4	3	3	4	3	4	3	3	2	3	3	3	2	2	4	4	2	4	3	2	3	3	3	3	3	3	3	3	4	4	3	3	3	3	3	3	3	3	3	3	4	2
0	1	1	0	2	3	4	4	4	4	4	4	4	3	4	4	4	3	3	4	3	3	3	3	3	3	3	3	4	4	5	4	4	4	4	4	4	4	4	3	4	3	3	3	3	3	3
0	2	1	0	2	5	4	3	5	4	5	4	5	4	4	4	5	4	4	4	5	3	4	4	4	3	3	3	3	3	3	3	3	3	4	5	3	4	5	3	3	3	3	4	5	5	3
1	1	3	0	4	4	4	3	5	4	4	5	4	4	4	4	5	4	3	5	4	3	3	4	4	4	4	4	4	4	5	4	4	4	4	4	4	3	4	3	4	3	3	4	4	4	3
0	2	1	0	2	3	4	5	5	4	4	4	4	4	4	4	4	4	4	5	4	3	4	3	3	4	4	4	5	4	5	5	4	5	5	4	5	4	5	4	5	4	4	4	4	3	4
0	2	3	0	4	5	5	4	5	5	5	5	5	5	5	5	5	5	5	5	5	3	5	5	5	5	5	5	5	5	5	5	5	5	5	5	4	5	5	5	5	5	3	5	5	5	5
0	2	3	0	4	4	4	4	5	5	4	4	4	4	4	4	4	4	4	5	5	4	4	3	4	4	4	4	4	4	4	4	4	4	4	5	4	4	5	5	5	5	4	5	4	4	5
0	2	3	0	3	5	5	3	5	5	5	5	5	3	5	5	5	3	3	5	5	1	3	1	5	3	3	5	5	5	5	3	5	3	5	5	3	3	5	3	3	3	3	3	3	5	3
0	2	3	0	4	4	4	4	4	4	4	4	4	4	4	4	4	4	4	4	4	4	4	4	4	4	4	5	4	4	4	4	4	4	4	4	4	4	4	4	5	5	4	4	4	4	4
1	2	3	0	2	4	4	4	4	4	4	4	4	3	4	4	4	3	3	4	4	1	4	4	4	4	4	4	4	4	4	4	4	4	5	4	4	4	4	4	4	4	4	4	4	4	4
0	2	3	0	4	5	4	5	5	3	5	4	5	3	5	5	4	3	3	5	5	5	4	5	5	4	5	3	4	4	4	3	4	2	4	5	3	3	4	3	4	4	3	3	5	4	1
0	2	1	0	3	4	4	3	5	4	4	3	3	4	3	3	4	4	3	4	4	2	4	5	3	4	4	4	3	3	4	4	4	4	4	3	4	4	4	3	4	4	3	4	4	3	3
0	1	3	0	2	4	4	4	5	4	4	5	4	3	4	4	4	3	4	5	4	3	4	4	4	4	4	3	4	4	4	4	4	4	4	4	4	4	4	4	4	4	3	4	4	3	3
1	2	1	0	1	5	5	5	5	5	5	5	5	4	5	5	5	4	4	4	5	4	5	5	5	4	4	4	4	5	5	5	5	5	5	5	5	4	5	4	4	4	5	4	5	5	4
0	2	3	0	3	4	4	3	5	5	4	4	4	3	4	4	4	3	3	4	3	3	3	3	4	4	3	3	3	4	4	4	4	4	3	3	4	4	4	3	4	4	3	4	4	3	3
0	1	3	0	2	4	4	4	4	4	4	4	5	4	4	4	4	4	4	4	4	4	4	4	4	4	4	4	4	4	4	4	4	4	4	4	4	4	4	4	4	4	4	4	4	4	4
0	2	1	0	4	5	5	5	5	5	5	5	5	5	5	5	5	5	5	5	5	4	3	4	4	5	5	5	5	5	5	5	5	5	5	5	5	5	3	5	5	5	4	4	4	5	3
1	2	1	0	4	3	4	3	4	2	5	3	5	1	5	5	5	1	1	5	2	1	1	2	5	5	5	2	5	4	5	5	4	1	2	4	1	4	5	5	5	5	5	1	4	5	1
1	2	3	0	2	4	4	4	4	4	4	4	4	4	4	4	4	4	4	4	4	4	4	4	4	4	4	4	4	4	4	4	4	4	4	4	4	4	4	4	4	4	4	4	4	4	4
0	2	1	0	4	3	4	5	5	4	4	4	5	5	4	5	3	5	5	5	3	2	3	3	4	4	4	3	5	5	5	5	5	5	5	5	5	4	4	5	5	5	3	5	5	5	5
0	2	3	0	3	5	5	5	5	5	5	5	5	4	4	5	5	4	4	5	5	3	3	5	5	5	5	5	5	5	5	5	5	5	5	5	5	4	5	5	5	5	4	5	5	5	3
1	2	3	0	2	5	5	5	5	5	5	5	5	5	5	5	5	5	5	5	3	3	4	5	5	5	4	5	5	5	5	5	5	5	5	5	5	5	5	4	4	5	4	3	4	4	4
1	2	2	0	3	4	4	4	4	4	4	4	4	4	4	4	4	4	4	4	4	4	4	4	4	4	4	4	4	4	4	4	4	4	4	4	4	4	4	4	4	4	4	4	4	5	4
0	2	1	0	4	5	4	4	5	4	4	4	5	3	5	4	5	3	3	4	3	3	4	4	4	4	5	4	4	5	5	3	3	3	5	5	4	5	5	5	5	5	3	3	3	4	3
0	2	3	0	2	5	5	3	5	5	5	3	5	5	4	4	5	5	4	4	4	3	3	5	5	3	4	4	4	4	4	4	4	3	5	4	4	3	5	4	4	4	3	4	5	4	3
1	2	1	0	4	1	1	2	2	3	3	3	3	3	3	3	3	3	3	3	3	3	3	3	3	3	3	3	3	3	3	3	3	3	3	3	3	3	3	3	3	3	3	3	3	3	3
0	2	3	0	2	4	3	3	4	4	4	4	5	4	4	4	4	4	4	5	5	3	4	2	4	4	4	4	3	4	4	4	4	4	4	3	4	3	5	4	5	4	3	3	4	4	1
0	2	3	0	1	4	4	4	4	5	4	4	5	4	4	4	4	4	4	4	5	4	4	4	5	3	3	5	4	4	4	4	4	4	4	4	4	5	5	4	4	4	3	3	5	5	4
0	2	3	0	3	5	5	5	5	5	5	5	5	5	5	5	5	5	5	5	5	5	5	5	4	5	5	5	5	5	5	5	5	5	5	5	5	3	5	5	5	4	4	5	4	4	4
0	1	3	0	2	5	5	5	5	5	4	5	5	5	5	5	5	5	5	5	5	5	5	5	5	5	5	4	5	5	5	5	5	5	5	5	5	5	5	5	5	5	5	5	5	5	5
0	1	31	0	2	5	5	5	5	5	5	5	5	5	5	5	5	5	5	5	5	5	5	5	5	5	5	5	5	5	5	5	5	5	5	5	5	5	5	5	5	5	5	5	5	5	5
1	2	3	0	4	4	4	2	4	4	4	4	2	3	4	2	2	3	4	4	2	2	2	2	4	2	4	2	2	2	4	4	4	4	4	4	4	4	4	4	4	4	4	4	4	4	4
0	2	3	0	2	4	4	5	5	5	5	5	5	5	5	5	5	5	5	5	5	5	5	5	5	5	5	5	5	5	5	5	5	5	5	5	5	5	5	5	5	5	5	5	5	5	5
0	1	3	0	2	4	3	4	4	4	4	4	4	4	3	4	4	4	3	4	4	3	4	4	4	3	4	4	5	4	4	4	4	4	4	4	4	4	5	4	4	5	3	3	4	4	4
0	2	3	0	4	5	5	5	5	5	5	5	5	3	5	5	5	3	4	4	3	4	3	5	5	4	5	3	3	3	4	5	5	5	5	5	5	5	5	5	5	5	5	4	5	5	2
0	2	1	0	2	5	5	5	5	5	4	5	5	5	4	4	5	5	5	5	5	4	5	4	5	3	5	5	4	3	4	4	4	5	5	5	5	5	5	5	5	5	3	5	5	5	2
0	2	3	0	3	5	4	3	5	4	4	4	5	2	4	3	4	2	3	4	5	4	4	4	4	3	4	3	3	4	5	4	3	3	4	4	4	3	4	4	4	4	3	3	4	5	3
1	2	3	0	2	5	5	5	5	5	5	5	5	5	5	5	5	5	5	5	3	3	3	4	5	5	5	4	5	5	5	5	5	5	5	5	5	5	5	5	5	5	5	5	5	5	5
0	2	3	0	1	5	5	5	5	4	5	4	5	5	5	5	5	5	5	5	5	5	5	5	5	5	4	5	5	5	5	4	3	4	4	5	5	5	5	5	5	5	4	2	3	3	1
0	2	3	0	2	4	5	3	4	2	4	5	5	3	4	4	3	3	3	5	4	2	4	4	5	4	5	4	5	4	5	4	4	5	5	4	5	5	4	5	3	5	4	5	5	5	5
0	2	1	0	2	4	4	4	5	4	4	5	5	4	4	4	4	4	4	5	4	3	4	3	4	4	4	4	4	4	5	4	5	5	5	5	5	4	5	4	4	5	4	4	4	4	4
0	1	3	0	3	5	5	5	5	2	5	5	5	5	5	5	5	5	5	5	5	4	5	5	5	5	5	5	5	5	5	5	5	5	5	5	5	5	5	5	5	5	5	5	5	5	5
1	1	1	0	4	5	5	4	4	5	4	5	4	3	4	4	4	3	4	4	4	3	4	4	5	3	4	4	4	4	5	4	4	4	4	4	5	4	4	4	4	4	4	4	5	5	3
0	2	3	0	3	5	5	5	5	3	5	5	3	1	5	5	3	1	1	5	5	4	3	3	5	5	5	5	3	5	5	5	5	5	5	5	5	2	2	3	3	3	3	4	5	5	5
1	1	3	0	3	4	4	4	4	3	4	3	4	4	4	4	3	4	4	4	4	3	3	4	4	4	4	4	4	3	4	5	5	5	5	4	4	4	4	4	4	4	4	3	5	5	3
0	2	1	1	1	4	4	5	5	3	4	5	4	3	4	4	5	3	3	3	4	3	3	3	4	4	4	3	3	4	4	5	5	5	4	4	5	4	5	3	3	4	3	4	4	3	3
1	1	3	0	1	5	5	5	5	5	5	5	5	4	5	5	4	4	5	5	4	4	4	4	4	4	4	4	3	5	4	5	5	5	4	4	5	4	4	4	5	4	4	4	5	5	5
0	2	3	0	4	5	4	4	5	3	4	4	4	4	4	3	4	4	5	5	5	4	4	4	4	4	3	4	3	4	4	4	4	4	5	4	4	4	4	4	5	4	3	4	5	4	3
0	2	3	0	1	4	4	4	4	4	4	4	4	3	4	4	4	3	4	4	3	3	4	4	3	4	4	4	3	4	4	4	4	4	4	4	4	4	3	4	4	4	4	4	4	4	4
0	2	1	0	3	4	3	4	5	4	3	4	4	3	2	2	4	3	2	5	5	2	2	3	4	3	4	3	2	4	3	4	2	2	4	2	2	3	4	3	4	4	2	3	4	3	3
1	2	3	0	1	4	4	4	3	3	5	4	3	4	2	5	3	4	4	4	4	4	4	4	5	4	4	4	5	4	4	4	4	3	4	4	4	4	4	4	4	4	4	4	4	4	4
0	2	3	0	2	4	4	4	4	4	4	4	4	4	4	4	3	4	4	3	3	3	4	4	3	4	4	3	4	4	3	4	4	4	4	4	4	4	4	4	4	4	3	4	4	3	3
1	2	3	0	1	3	4	5	5	4	4	4	4	4	4	4	4	4	5	3	4	4	4	4	4	5	4	5	5	4	4	4	3	3	5	4	4	4	3	4	4	4	4	4	4	5	5
0	2	3	0	1	5	5	5	5	5	5	5	5	4	5	5	5	4	3	5	3	1	3	4	5	4	5	3	3	5	5	5	5	5	5	5	5	5	5	5	5	5	5	5	5	5	5
1	2	3	0	3	4	4	3	4	3	5	3	3	3	4	4	3	3	4	5	4	2	4	4	4	4	3	3	5	5	5	3	3	3	3	4	4	5	5	4	4	4	3	3	5	5	5
1	2	1	0	1	5	5	5	5	5	5	5	5	4	5	5	5	4	4	4	5	4	5	5	5	4	4	4	4	5	5	5	5	5	5	5	5	4	5	4	4	4	5	4	5	5	4
0	2	3	0	1	4	3	3	4	4	4	4	4	3	4	4	4	3	4	5	2	2	3	4	5	4	3	3	4	4	5	5	5	5	5	4	4	4	4	4	4	4	3	3	3	3	3
1	2	1	0	1	5	5	5	5	5	5	5	5	5	5	5	5	5	5	5	5	5	5	5	5	5	5	5	5	5	5	5	5	5	5	5	5	5	5	5	5	5	5	5	5	5	5
0	2	3	0	1	4	4	5	5	4	4	4	4	4	4	4	4	4	4	4	2	2	4	3	4	4	4	4	4	4	4	4	4	4	4	4	4	4	4	4	4	4	4	4	4	4	4
0	2	3	0	1	4	5	5	4	5	5	4	4	4	4	4	4	4	4	5	3	4	4	3	3	4	4	4	4	4	4	4	4	4	4	4	4	4	4	4	4	5	4	4	4	4	4
0	1	13	0	2	2	3	3	3	4	3	3	4	3	3	3	4	3	2	4	2	2	2	3	2	3	3	2	3	2	4	3	3	3	3	3	2	3	3	4	3	4	3	4	3	3	3
0	2	3	0	4	3	4	4	4	3	4	4	5	2	4	4	4	2	3	5	4	4	3	4	5	5	4	3	4	4	4	4	5	4	5	4	3	3	3	4	3	4	2	3	5	4	2
0	2	1	0	1	4	4	4	4	4	4	4	4	4	4	4	4	4	4	4	4	4	4	4	4	4	4	4	4	4	4	4	4	4	4	4	4	4	4	4	4	4	4	4	4	4	4
1	2	3	0	2	4	4	5	5	5	4	4	2	4	4	3	4	4	4	4	3	3	4	4	3	4	4	4	4	5	5	4	4	5	4	4	4	4	4	3	4	4	3	3	4	4	4
1	1	1	0	1	4	4	4	5	4	4	3	5	3	4	3	4	3	3	4	4	3	4	3	3	4	4	4	3	4	4	4	4	4	4	4	4	3	3	4	4	4	3	4	4	4	4
0	2	3	0	2	4	4	4	4	4	4	4	4	4	4	5	5	4	4	5	4	4	4	4	5	5	4	4	4	4	5	4	4	4	4	5	4	4	4	5	5	4	5	5	4	5	4
1	2	3	0	4	3	4	3	4	3	3	2	2	3	4	4	4	3	3	4	3	2	3	1	2	3	2	3	5	3	4	3	3	3	2	2	4	4	3	3	3	2	4	4	4	5	3
0	2	2	0	3	4	4	4	5	4	4	4	4	3	3	4	3	3	5	5	5	5	2	5	4	4	4	4	5	5	5	4	4	4	5	5	5	5	5	5	5	5	4	4	4	4	3
0	2	2	0	4	4	4	4	4	5	4	4	4	4	4	4	4	4	4	4	4	4	4	4	4	5	4	4	4	4	4	4	4	4	4	4	4	4	4	4	4	4	3	3	4	4	3
1	2	1	0	2	4	4	4	4	4	4	4	4	4	4	5	4	4	4	4	4	4	4	4	4	4	4	3	4	3	4	4	4	4	4	4	3	4	4	4	5	4	4	4	4	4	3
1	2	3	0	4	5	5	4	5	5	5	5	5	3	4	4	4	3	4	5	4	2	2	2	2	5	3	5	5	5	5	5	5	5	5	5	5	5	5	5	5	5	3	3	5	5	2
1	2	3	0	2	4	4	3	4	4	4	3	3	4	4	4	4	4	3	4	2	3	3	3	3	3	3	3	3	4	3	4	3	3	3	4	3	3	3	3	3	3	3	3	3	3	4
0	1	1	0	2	5	5	5	5	5	5	5	5	4	5	5	5	4	4	5	5	4	5	5	5	5	4	4	4	4	5	4	4	5	4	4	4	4	5	5	5	5	4	4	5	4	5
1	2	1	0	2	4	4	4	5	3	3	3	4	2	4	4	4	2	3	4	3	2	3	2	2	3	2	2	3	2	4	3	3	4	3	3	3	3	3	3	4	4	3	3	4	3	3
0	1	1	0	4	4	5	5	4	5	4	4	3	2	3	4	4	2	4	3	4	4	3	5	4	4	4	4	5	4	4	4	4	4	4	3	4	4	5	4	4	4	4	4	3	2	3
0	1	3	0	1	4	4	4	4	4	3	3	3	3	3	3	3	3	3	4	3	3	4	3	3	3	3	3	3	3	3	4	4	4	4	3	4	4	4	5	3	4	3	3	3	3	3
0	2	1	0	4	5	5	4	5	4	4	4	4	4	4	4	4	4	4	5	4	4	4	4	4	4	4	4	4	4	4	4	4	4	4	4	4	4	4	4	4	4	5	5	5	5	5
1	2	1	0	3	4	4	4	4	4	4	4	4	4	4	4	4	4	4	4	4	4	4	4	4	4	4	4	4	4	4	4	4	4	4	4	4	4	4	4	4	4	4	4	4	4	4
0	1	3	0	1	4	4	3	5	4	4	4	4	3	4	3	4	3	4	4	3	3	3	4	4	4	4	3	3	3	4	4	4	4	4	4	4	4	4	3	4	4	3	3	3	4	4
0	2	1	0	4	4	3	5	5	5	4	3	5	3	4	3	4	3	4	5	5	4	3	4	5	2	3	3	4	5	4	3	4	4	5	5	4	4	5	4	5	4	3	5	5	5	3
1	2	1	0	2	4	4	3	4	4	4	4	4	3	4	4	4	3	4	5	4	4	4	3	4	4	4	4	3	3	4	4	4	4	3	4	4	4	4	4	4	4	3	3	4	4	3
1	1	1	0	2	5	4	4	5	4	3	3	4	3	3	3	4	3	4	4	3	2	2	2	2	3	4	4	2	4	5	5	5	5	4	4	4	4	3	3	4	5	4	5	3	3	2
1	1	1	0	2	3	5	1	5	4	5	3	4	4	5	4	5	4	5	4	3	2	4	4	4	4	5	4	4	5	4	5	4	4	4	5	5	5	5	5	5	5	5	4	5	5	5
1	2	1	0	4	3	4	3	4	2	5	3	5	1	5	5	5	1	1	5	2	1	1	2	5	5	5	2	5	4	5	5	4	1	2	4	1	4	5	5	5	5	5	1	4	5	1
1	1	1	0	4	5	3	5	5	5	5	4	5	3	5	3	3	3	4	5	5	3	3	4	4	5	5	4	4	5	4	2	3	1	3	3	3	3	3	5	5	5	5	4	5	5	5
0	3	3	0	4	4	4	4	4	4	4	4	4	4	4	4	4	4	3	3	3	3	3	3	4	4	4	4	3	4	4	4	4	4	4	4	4	4	4	3	3	3	3	3	3	3	3
0	1	3	0	1	4	4	4	4	3	4	4	5	4	3	4	4	4	4	4	4	4	4	4	4	4	4	4	3	5	4	4	4	4	4	4	4	4	4	3	4	4	3	3	3	3	4
1	1	1	0	2	1	1	1	1	2	2	3	2	2	2	2	3	2	3	4	1	1	1	1	1	1	2	1	1	1	1	1	2	1	1	3	4	2	3	3	3	3	2	1	1	1	3
0	2	3	0	4	5	5	4	5	4	4	4	4	3	4	4	4	3	5	5	5	5	4	4	4	5	4	4	3	4	5	5	5	5	5	5	5	4	5	4	5	4	3	3	3	5	4
0	2	2	0	3	4	4	4	5	4	4	4	4	3	3	4	3	3	5	5	5	5	2	5	4	4	4	4	5	5	5	4	4	4	5	5	5	5	5	5	5	5	4	4	4	4	3
0	1	1	0	2	3	4	4	4	4	4	4	4	3	4	4	4	3	3	4	3	3	3	3	3	3	3	3	4	4	5	4	4	4	4	4	4	4	4	3	4	3	3	3	3	3	3
1	2	3	0	2	4	5	4	5	5	4	5	4	4	4	4	5	4	4	5	5	2	4	5	4	5	4	4	4	5	5	4	4	5	5	5	5	4	5	4	4	4	3	4	5	4	4
1	2	1	0	2	2	2	2	2	4	2	3	2	1	2	1	3	1	2	1	2	2	2	1	2	4	4	3	3	3	2	3	2	3	3	3	2	3	2	2	2	2	3	2	2	3	3
1	2	1	0	4	3	4	3	4	2	5	3	5	1	5	5	5	1	1	5	2	1	1	2	5	5	5	2	5	4	5	5	4	1	2	4	1	4	5	5	5	5	5	1	4	5	1
0	1	3	0	2	5	5	3	5	4	3	3	4	4	3	4	5	4	4	5	5	3	4	3	3	4	4	3	4	3	4	4	4	4	5	4	4	4	5	4	4	4	3	3	5	5	3
0	1	1	0	2	4	5	4	5	3	4	5	4	1	3	4	5	1	2	5	5	4	4	5	4	4	4	4	4	5	5	5	5	5	5	5	5	3	5	4	4	3	3	5	5	5	5
0	2	3	0	1	5	5	5	5	5	5	5	4	3	4	4	3	3	5	5	5	3	4	4	1	4	4	4	4	5	5	5	5	5	5	5	5	4	4	5	5	4	3	3	5	4	3
0	2	1	0	3	4	4	3	3	3	4	3	3	3	3	3	3	3	3	3	3	3	3	3	3	3	4	3	2	3	2	3	3	3	3	2	3	3	3	5	5	5	1	3	4	4	4
0	2	3	0	2	3	4	3	4	4	4	4	4	3	3	3	3	3	4	4	4	4	3	4	4	4	4	4	4	4	4	4	4	4	4	3	4	4	4	4	4	5	4	3	3	3	4
0	2	1	0	3	4	4	3	3	3	4	3	3	3	3	3	3	3	3	3	3	3	3	3	3	3	4	3	2	3	2	3	3	3	3	2	3	3	3	5	5	5	1	3	4	4	4
1	2	1	1	3	4	5	5	5	3	3	4	4	4	5	5	4	4	3	5	4	4	4	5	5	4	4	4	3	4	3	4	4	5	5	4	4	4	3	4	3	4	4	4	4	3	4
0	1	3	0	1	4	4	4	5	5	4	4	4	4	4	4	5	4	4	3	4	3	4	4	4	4	4	4	4	4	4	4	4	4	4	4	4	4	4	4	4	4	4	4	4	4	4
0	1	1	0	2	4	4	3	4	3	4	3	4	4	3	4	3	4	3	4	3	3	4	4	4	4	4	4	5	5	5	5	4	4	4	4	4	4	5	4	3	3	3	4	5	3	4
1	2	3	0	1	4	3	5	5	5	4	5	4	3	5	4	4	3	3	4	3	4	2	3	2	3	2	3	2	5	5	4	5	4	3	4	4	4	3	5	5	4	3	3	5	3	2
0	2	3	0	1	4	4	4	4	5	4	4	5	4	4	4	4	4	4	4	5	4	4	4	5	3	3	5	4	4	4	4	4	4	4	4	4	5	5	4	4	4	3	3	5	5	4
0	1	1	0	2	3	4	4	4	4	4	4	4	3	4	4	4	3	3	4	3	3	3	3	3	3	3	3	4	4	5	4	4	4	4	4	4	4	4	3	4	3	3	3	3	3	3
